# Supplementary material
Source: Copernicus journal article supplement (doi:10.5194/egusphere-2026-3160)
Supplement: Supplementary file 1 [file egusphere-2026-3160-supplement.pdf]

*Supplement of*

**Global budgets of atmospheric primary and secondary organic aerosols constrained by full-volatility-range organic emissions**

R. Miao et al.

*Correspondence to:* Qi Chen (qichenpku@pku.edu.cn)

The copyright of individual parts of the supplement might differ from the article license.

**Table S1.** The OA species of the default complex OA scheme and the full-volatility-range OA scheme. S/LVOC-SOA, IVOC-SOA, AVOC-SOA, and BVOC-SOA are SOA formed from semivolatile and low-volatility organic compounds (S/LVOCs), intermediate-volatility organic compounds (IVOCs), aromatic volatile organic compounds (AVOCs), and biogenic volatile organic compounds (BVOCs), respectively. Aqueous SOA is SOA formed from heterogeneous uptake of isoprene epoxydiols, glyoxal, and methylglyoxal.

| Category    | Default complex OA scheme                       | Full-volatility-range OA scheme                          |
|-------------|-------------------------------------------------|----------------------------------------------------------|
| POA         | POA1, POA2                                      | POA1, POA2, POA3, POA4, POA5                             |
| S/LVOC-SOA  | OPOA1, OPOA2                                    | OPOA1, OPOA2, OPOA3                                      |
| IVOC-SOA    | ASOA1, ASOA2, ASOA3, ASOAN                      | ASOA1, ASOA2, ASOA3, ASOA0                               |
| AVOC-SOA    |                                                 | IVSOA1, IVSOA2, IVSOA3, IVSOA0, IVSOAN                   |
| BVOC-SOA    | TSOA1, TSOA2, TSOA3, TSOA0                      | TSOA1, TSOA2, TSOA3, TSOA0<br>ISOA1, ISOA2, ISOA3, ISOA0 |
| Aqueous SOA | SOAGX, SOAIE, LVOCOA, IONITA,<br>INDIOL, MONITA | SOAGX, SOAIE, LVOCOA, IONITA                             |

**Table S2.** Updated SOA yield parameterizations for IVOCs at 298 K under high NO<sub>x</sub> conditions. The saturation concentration ( $C^*$ ) is in unit of  $\mu\text{g m}^{-3}$ . The correction factor to account for the vapor wall losses is 1.2 for all precursors (Zhang et al., 2014). We apply the same SOA yields for the IVOC species with  $C^*$  of  $10^3$  and  $10^4 \mu\text{g m}^{-3}$  due to the lack of experiments for IVOC species with carbon numbers over 17 in their formulae.

| Lumped precursors | $C^*$  | Oxidant | Mass-based stoichiometric coefficients ( $\alpha$ ) for $C^*$ |       |       |       | SOA yield at $10 \mu\text{g m}^{-3}$ | Reference                                  |
|-------------------|--------|---------|---------------------------------------------------------------|-------|-------|-------|--------------------------------------|--------------------------------------------|
|                   |        |         | 0.1                                                           | 1     | 10    | 100   |                                      |                                            |
| IVOC6             | $10^6$ | OH      | 0.011                                                         | 0.052 | 0.201 | 0.296 | 0.19                                 | Presto et al. (2010)<br>Zhao et al. (2014) |
| IVOC5             | $10^5$ |         | 0.049                                                         | 0.078 | 0.439 | 0.271 | 0.36                                 |                                            |
| IVOC4             | $10^4$ |         | 0.063                                                         | 0.089 | 0.550 | 0.200 | 0.44                                 |                                            |
| IVOC3             | $10^3$ |         |                                                               |       |       |       |                                      |                                            |

**Table S3.** Empirical scalars used to estimate the emissions of IVOCs and S/LVOCs from waste treatment and open biomass burning by scaling from corresponding NMVOC and OC emissions, respectively. The scalars for waste treatment refer to the experiments from Stewart et al. (2021) for municipal solid waste. The scalars for open biomass burning base on the experiments from Koss et al. (2018), Hatch et al. (2017), and May et al. (2013).

| Category | $C^*$ ( $\mu\text{g m}^{-3}$ ) | Waste treatment | Open biomass burning |
|----------|--------------------------------|-----------------|----------------------|
| IVOCs    | $10^6$                         | 0.155           | 0.088                |
|          | $10^5$                         | 0.046           | 0.040                |
|          | $10^4$                         | 0.036           | 0.004                |
|          | $10^3$                         | 0.018           | 0.004                |
| SVOCs    | $10^2$                         | 0.165           | 0.466                |
|          | $10^1$                         | 0.686           | 0.234                |
|          | $10^0$                         | 0.329           | 0.234                |
| LVOCs    | $10^{-1}$                      | 0.055           | 0.000                |
|          | $10^{-2}$                      | 0.165           | 0.466                |

**Table S4.** Descriptions of the simulation runs. “None” means excluding corresponding emissions from simulations.

| Simulation runs | OA scheme                       | Wet deposition         | Emissions of Organic Precursors                                                                                                                                 |                                                                                                                             |                    |
|-----------------|---------------------------------|------------------------|-----------------------------------------------------------------------------------------------------------------------------------------------------------------|-----------------------------------------------------------------------------------------------------------------------------|--------------------|
|                 |                                 |                        | Anthropogenic emissions                                                                                                                                         | Open biomass burning                                                                                                        | Biogenic emissions |
| Default         |                                 |                        | CEDS w/ scalar suggested by Pye and Seinfeld (2010)                                                                                                             | FINNv2.5 w/ scalar suggested by Pye and Seinfeld (2010)                                                                     | MEGANv2.1          |
| Default_emis    | Default complex OA scheme       | Default wet deposition | Amount: MEIC-global-FVOC + waste emissions from CEDS w/ scalar suggested by Chen et al. (2024)<br>Volatility distribution: according to Pye and Seinfeld (2010) | Amount: FINNv2.5 w/ scalar suggested by Chen et al. (2024)<br>Volatility distribution: according to Pye and Seinfeld (2010) | Same as Default    |
| Base            |                                 |                        | MEIC-global-FVOC + waste emissions from CEDS w/ scalar suggested by Chen et al. (2024)                                                                          | FINNv2.5 w/ scalar suggested by Chen et al. (2024)                                                                          | MEGANv2.1          |
| Zero_Biof       |                                 |                        | Same as Base but excluding residential biofuel emissions                                                                                                        | ---                                                                                                                         | Same as Base       |
| Zero_Anthro     | Full-volatility-range OA scheme | Default wet deposition | ---                                                                                                                                                             | Same as Base                                                                                                                | Same as Base       |
| Zero_BioBurn    |                                 |                        | Same as Base                                                                                                                                                    | ---                                                                                                                         | Same as Base       |
| Zero_Biog       |                                 |                        | Same as Base                                                                                                                                                    | Same as Base                                                                                                                | ---                |
| WDLuo           |                                 | Luo et al. (2020)      | Same as Base                                                                                                                                                    | Same as Base                                                                                                                | Same as Base       |

**Table S5.** List of the year-long observed campaign-mean mass concentrations of OC in Asia, Africa, and Latin America adopted from literatures. “CN”, “KR”, “IN”, “VN”, “TH”, “MY”, “CI”, “BJ”, “ET”, “AR”, “BR”, “CO”, “CR”, “EC”, and “MX” represent China, Korea, India, Vietnam, Thailand, Malaysia, Côte d'Ivoire, Benin, Ethiopia, Argentina, Colombia, Costa Rica, Ecuador, Brazil, and Mexico, respectively. The unit for OC is  $\mu\text{g m}^{-3}$ .

| Region | Country | Lon    | Lat   | Start   | End     | OC   | Reference                    |
|--------|---------|--------|-------|---------|---------|------|------------------------------|
| Asia   | CN      | 118.75 | 32.06 | 2018/1  | 2018/12 | 6.1  | Xie et al. (2022)            |
| Asia   | CN      | 120.98 | 31.09 | 2018/1  | 2018/12 | 5.8  | M. Wang et al. (2022)        |
| Asia   | CN      | 114.21 | 30.31 | 2017/3  | 2018/2  | 8.9  | Huang et al. (2019)          |
| Asia   | CN      | 104.07 | 30.63 | 2019/1  | 2019/12 | 9.3  | X. Xu et al. (2021)          |
| Asia   | CN      | 106.50 | 29.62 | 2019/11 | 2020/10 | 9.0  | Ding et al. (2022)           |
| Asia   | CN      | 118.08 | 24.45 | 2017/1  | 2018/1  | 5.5  | Wu et al. (2020)             |
| Asia   | CN      | 112.47 | 23.06 | 2019/1  | 2019/12 | 5.9  | Lu et al. (2021)             |
| Asia   | CN      | 112.93 | 22.71 | 2019/1  | 2019/12 | 4.9  | Lu et al. (2021)             |
| Asia   | CN      | 114.11 | 22.37 | 2017/1  | 2017/12 | 6.3  | Chow et al. (2022)           |
| Asia   | CN      | 111.76 | 40.82 | 2019/10 | 2020/10 | 7.6  | P. Liu et al. (2023)         |
| Asia   | CN      | 103.87 | 36.05 | 2019/12 | 2020/11 | 8.0  | Wang et al. (2021)           |
| Asia   | CN      | 120.63 | 31.29 | 2020/1  | 2020/12 | 6.4  | Y. e. Li et al. (2022)       |
| Asia   | CN      | 113.79 | 23.02 | 2019/1  | 2019/12 | 6.4  | Tao et al. (2023)            |
| Asia   | KR      | 127.41 | 37.61 | 2018/1  | 2018/12 | 4.2  | Park et al. (2022)           |
| Asia   | KR      | 126.94 | 37.61 | 2018/1  | 2018/12 | 4.2  | Park et al. (2022)           |
| Asia   | KR      | 126.85 | 35.23 | 2018/1  | 2018/12 | 3.9  | Park et al. (2022)           |
| Asia   | KR      | 124.63 | 37.97 | 2018/1  | 2018/12 | 2.1  | Park et al. (2022)           |
| Asia   | KR      | 129.32 | 35.58 | 2018/1  | 2018/12 | 3.1  | Park et al. (2022)           |
| Asia   | KR      | 126.39 | 33.35 | 2018/1  | 2018/12 | 1.9  | Park et al. (2022)           |
| Asia   | KR      | 127.74 | 37.87 | 2018/2  | 2019/1  | 4.1  | Choi et al. (2022)           |
| Asia   | KR      | 126.83 | 37.32 | 2021/1  | 2021/12 | 3.7  | Hwang et al. (2023)          |
| Asia   | KR      | 126.49 | 36.78 | 2021/1  | 2021/12 | 4.6  | Hwang et al. (2023)          |
| Asia   | KR      | 124.63 | 37.97 | 2019/1  | 2019/12 | 2.0  | Afzal et al. (2025)          |
| Asia   | IN      | 75.46  | 29.10 | 2018/1  | 2018/12 | 18.9 | Bhowmik et al. (2021)        |
| Asia   | IN      | 77.17  | 28.63 | 2018/1  | 2018/12 | 21.6 | Bhowmik et al. (2021)        |
| Asia   | IN      | 77.28  | 28.45 | 2018/1  | 2018/12 | 16.0 | Bhowmik et al. (2021)        |
| Asia   | IN      | 80.23  | 26.51 | 2018/1  | 2018/12 | 18.9 | Bhowmik et al. (2021)        |
| Asia   | IN      | 77.17  | 28.63 | 2018/1  | 2018/12 | 13.4 | Sharma et al. (2022)         |
| Asia   | IN      | 77.34  | 28.50 | 2016/12 | 2017/12 | 14.8 | Shivani et al. (2019)        |
| Asia   | IN      | 88.27  | 27.04 | 2018/8  | 2019/6  | 3.6  | Rai et al. (2021)            |
| Asia   | IN      | 77.41  | 23.26 | 2019/1  | 2019/12 | 9.5  | Yadav et al. (2022)          |
| Asia   | IN      | 76.61  | 12.31 | 2019/1  | 2019/12 | 4.5  | Yadav et al. (2022)          |
| Asia   | IN      | 88.39  | 22.84 | 2019/1  | 2019/12 | 11.3 | Mukherjee et al. (2023)      |
| Asia   | IN      | 85.70  | 23.68 | 2019/1  | 2019/12 | 14.8 | Pullokaran et al. (2024)     |
| Asia   | IN      | 94.16  | 26.74 | 2019/1  | 2019/12 | 7.9  | Qadri et al. (2024)          |
| Asia   | IN      | 76.80  | 28.21 | 2016/12 | 2017/12 | 12.1 | Shivani et al. (2019)        |
| Asia   | VN      | 105.80 | 21.01 | 2019/8  | 2020/8  | 10.3 | Makkonen et al. (2023)       |
| Asia   | VN      | 106.68 | 10.76 | 2019/9  | 2020/8  | 8.8  | Tran et al. (2023)           |
| Asia   | TH      | 100.50 | 7.01  | 2018/1  | 2018/12 | 2.1  | Phairuang et al. (2020)      |
| Asia   | TH      | 98.35  | 7.89  | 2017/3  | 2018/2  | 3.1  | ChooChuay et al. (2020)      |
| Asia   | TH      | 98.96  | 18.80 | 2021/1  | 2021/12 | 11.3 | Santijitpakdee et al. (2024) |

|               |    |        |        |         |         |      |                               |
|---------------|----|--------|--------|---------|---------|------|-------------------------------|
| Asia          | TH | 101.24 | 6.88   | 2019/5  | 2020/2  | 2.1  | Chaisongkaew et al. (2023)    |
| Asia          | MY | 101.70 | 3.17   | 2017/2  | 2017/12 | 2.7  | Jamhari et al. (2022)         |
| Africa        | CI | -3.99  | 5.35   | 2019/1  | 2019/12 | 4.0  | Gnamien et al. (2023)         |
| Africa        | CI | -5.63  | 9.43   | 2019/1  | 2019/12 | 6.3  | Gnamien et al. (2023)         |
| Africa        | BJ | 2.43   | 2.35   | 2016/3  | 2017/3  | 8.5  | Djossou et al. (2018)         |
| Africa        | ET | 38.75  | 9.02   | 2015/12 | 2016/11 | 17.0 | Tefera et al. (2020)          |
| Latin America | AR | -58.51 | -34.57 | 2019/4  | 2020/3  | 5.2  | Dawidowski et al. (2024)      |
| Latin America | BR | -75.61 | 6.24   | 2019/4  | 2020/3  | 7.4  | Dawidowski et al. (2024)      |
| Latin America | CO | -84.09 | 9.93   | 2019/5  | 2020/4  | 5.1  | Dawidowski et al. (2024)      |
| Latin America | CR | -78.51 | -0.22  | 2019/4  | 2020/3  | 4.3  | Dawidowski et al. (2024)      |
| Latin America | EC | -46.73 | -23.56 | 2019/4  | 2019/12 | 5.5  | Dawidowski et al. (2024)      |
| Latin America | MX | -99.15 | 19.48  | 2019/4  | 2020/3  | 6.3  | Dawidowski et al. (2024)      |
| Latin America | MX | -99.22 | 18.93  | 2016/7  | 2017/6  | 7.5  | Valle-Hernández et al. (2024) |

**Table S6.** List of the observed campaign-mean mass concentrations of OA, POA, POA<sub>exCOA</sub> (POA exclude COA) and OOA as well as site locations for North America. The observed POA and OOA concentrations were derived from positive matrix factorization (PMF) analysis on online measurements by aerosol mass spectrometers. The units for OA, POA, POA<sub>exCOA</sub>, and OOA are  $\mu\text{g m}^{-3}$ . “US” and “CA” represent the United States and Canada, respectively.

| Country | Lon     | Lat   | Start      | End        | OA    | POA  | POA <sub>exCOA</sub> | OOA  | Reference                   |
|---------|---------|-------|------------|------------|-------|------|----------------------|------|-----------------------------|
| US      | -117.49 | 34.10 | 2015/7/9   | 2015/7/28  | 4.24  | 1.01 | 0.42                 | 3.23 | Chen et al. (2018)          |
| US      | -119.77 | 36.79 | 2018/10/16 | 2018/11/30 | 11.11 | 3.06 | 3.06                 | 8.05 | Sun et al. (2022)           |
| US      | -119.77 | 36.79 | 2018/12/1  | 2019/2/28  | 8.82  | 3.19 | 3.19                 | 5.62 | Sun et al. (2022)           |
| US      | -119.77 | 36.79 | 2019/3/1   | 2019/5/4   | 4.27  | 0.61 | 0.61                 | 3.66 | Sun et al. (2022)           |
| US      | -84.41  | 33.77 | 2017/7/19  | 2017/8/25  | 6.40  | 1.14 | 0.66                 | 5.26 | F. Liu et al. (2023)        |
| US      | -84.41  | 33.77 | 2018/1/15  | 2018/2/11  | 3.89  | 1.96 | 1.39                 | 1.93 | F. Liu et al. (2023)        |
| US      | -85.04  | 33.93 | 2016/8/18  | 2016/10/11 | 5.00  | 0.00 | 0.00                 | 5.00 | Y. Chen et al. (2020)       |
| US      | -84.78  | 45.55 | 2016/7/1   | 2016/7/31  | 1.90  | 0.00 | 0.00                 | 1.90 | Bui et al. (2021)           |
| US      | -73.14  | 40.96 | 2018/6/25  | 2018/8/9   | 5.59  | 0.57 | 0.57                 | 5.02 | Zhang et al. (2022)         |
| US      | -73.95  | 40.82 | 2022/7/8   | 2022/8/7   | 4.41  | 1.15 | 0.47                 | 3.26 | Hass-Mitchell et al. (2024) |
| US      | -73.82  | 40.74 | 2022/7/8   | 2022/8/7   | 4.45  | 1.00 | 0.44                 | 3.44 | Hass-Mitchell et al. (2024) |
| US      | -97.48  | 36.60 | 2016/4/24  | 2016/5/20  | 2.39  | 0.48 | 0.48                 | 1.91 | Liu et al. (2021)           |
| US      | -97.48  | 36.60 | 2016/8/28  | 2016/9/24  | 3.88  | 0.50 | 0.50                 | 3.39 | Liu et al. (2021)           |
| US      | -75.19  | 39.96 | 2016/1/31  | 2016/3/2   | 3.23  | 1.38 | 0.69                 | 1.85 | Avery et al. (2019)         |
| US      | -75.19  | 39.96 | 2016/7/13  | 2016/8/13  | 5.87  | 2.15 | 0.46                 | 3.72 | Avery et al. (2019)         |
| US      | -97.73  | 30.39 | 2018/6/2   | 2018/6/28  | 2.50  | 0.00 | 0.00                 | 2.50 | Patel et al. (2020)         |
| US      | -95.25  | 29.72 | 2015/2/7   | 2015/2/27  | 5.51  | 2.91 | 2.44                 | 2.60 | Wallace et al. (2018)       |
| US      | -95.25  | 29.73 | 2015/5/13  | 2015/5/29  | 1.14  | 0.25 | 0.25                 | 0.89 | Al-Naiema et al. (2018)     |
| US      | -97.08  | 27.80 | 2021/4/2   | 2021/4/22  | 6.08  | 0.91 | 0.91                 | 5.16 | Zhou et al. (2023)          |
| US      | -98.48  | 29.37 | 2017/5/2   | 2017/5/26  | 5.86  | 0.82 | 0.82                 | 5.04 | Guo et al. (2024)           |
| CA      | -79.4   | 43.66 | 2016/5/10  | 2016/8/31  | 6.01  | 2.11 | 0.71                 | 3.9  | Jeong et al. (2019)         |

**Table S7.** Same as Table S6, but for Europe. “IN”, “NL”, “DE”, “FI”, “LT”, “ES”, “IT”, and “GR” represent Ireland, Netherlands, Germany, Finland, Lithuania, Spain, Italy, and Greece, respectively.

| Country | Lon   | Lat   | Start      | End        | OA   | POA  | POA <sub>exCOA</sub> | SOA  | Reference                |
|---------|-------|-------|------------|------------|------|------|----------------------|------|--------------------------|
| IE      | -7.91 | 53.10 | 2015/12/2  | 2015/12/29 | 2.90 | 1.89 | 1.89                 | 1.02 | Lin et al. (2019)        |
| IE      | -9.06 | 53.28 | 2016/2/5   | 2016/2/29  | 1.98 | 1.12 | 1.12                 | 0.86 | Lin et al. (2022)        |
| IE      | -9.06 | 53.28 | 2016/3/1   | 2016/5/31  | 2.05 | 0.70 | 0.70                 | 1.35 | Lin et al. (2022)        |
| IE      | -9.06 | 53.28 | 2016/6/1   | 2016/7/31  | 0.92 | 0.16 | 0.10                 | 0.76 | Lin et al. (2022)        |
| NL      | 4.926 | 51.97 | 2021/5/11  | 2021/5/31  | 2.49 | 0.54 | 0.54                 | 1.94 | Nursanto et al. (2023)   |
| NL      | 4.926 | 51.97 | 2021/6/1   | 2021/6/22  | 6.35 | 0.43 | 0.43                 | 5.92 | Nursanto et al. (2023)   |
| NL      | 4.926 | 51.97 | 2021/9/1   | 2021/9/30  | 2.18 | 0.31 | 0.31                 | 1.87 | Nursanto et al. (2023)   |
| DE      | 6.41  | 50.91 | 2019/1/15  | 2019/2/10  | 0.41 | 0.11 | 0.11                 | 0.30 | Liu et al. (2024)        |
| DE      | 6.41  | 50.91 | 2019/4/8   | 2019/5/5   | 1.08 | 0.26 | 0.26                 | 0.82 | Liu et al. (2024)        |
| DE      | 6.41  | 50.91 | 2019/8/7   | 2019/9/1   | 3.49 | 0.14 | 0.14                 | 3.35 | Liu et al. (2024)        |
| DE      | 6.41  | 50.91 | 2019/11/11 | 2019/11/24 | 2.06 | 1.12 | 1.12                 | 0.94 | Liu et al. (2024)        |
| DE      | 8.42  | 49.01 | 2019/6/28  | 2019/7/29  | 3.11 | 0.55 | 0.18                 | 2.56 | Song et al. (2022)       |
| DE      | 8.42  | 49.01 | 2020/2/21  | 2020/3/31  | 3.36 | 1.75 | 1.21                 | 1.61 | Song et al. (2022)       |
| FI      | 27.65 | 62.90 | 2020/9/15  | 2020/11/24 | 2.35 | 0.14 | 0.14                 | 2.20 | Kommula et al. (2024)    |
| LT      | 25.18 | 54.64 | 2017/5/11  | 2017/6/14  | 6.35 | 1.78 | 1.78                 | 4.57 | Pauraite et al. (2018)   |
| LT      | 25.32 | 54.72 | 2021/10/8  | 2021/11/12 | 7.32 | 4.88 | 4.88                 | 2.44 | Pauraite et al. (2023)   |
| ES      | -3.39 | 37.1  | 2021/6/8   | 2021/7/13  | 2.68 | 0.13 | 0.13                 | 2.55 | Rejano et al. (2024)     |
| IT      | 12.5  | 41.88 | 2017/1/27  | 2017/2/28  | 7.49 | 1.87 | 0.94                 | 5.62 | Costabile et al. (2017)  |
| GR      | 25.67 | 35.33 | 2016/5/9   | 2016/6/4   | 1.51 | 0.21 | 0.21                 | 1.29 | Florou et al. (2024)     |
| GR      | 21.78 | 38.30 | 2019/2/28  | 2019/5/31  | 3.50 | 2.09 | 1.70                 | 1.41 | Manousakas et al. (2020) |
| GR      | 21.78 | 38.30 | 2019/6/1   | 2019/6/30  | 3.09 | 0.83 | 0.49                 | 2.26 | Manousakas et al. (2020) |
| GR      | 21.78 | 38.30 | 2018/10/25 | 2018/11/30 | 4.69 | 1.78 | 1.26                 | 2.91 | Manousakas et al. (2020) |
| GR      | 22.20 | 37.98 | 2021/9/1   | 2021/11/30 | 0.75 | 0.19 | 0.19                 | 0.56 | Zografou et al. (2024)   |

**Table S8.** Same as Table S6, but for Asia. “CN”, “KR”, and “IN” represent China, Korea, and India, respectively.

| Country | Lon    | Lat   | Start      | End        | OA    | POA   | POA <sub>exCOA</sub> | SOA   | Reference              |
|---------|--------|-------|------------|------------|-------|-------|----------------------|-------|------------------------|
| CN      | 114.36 | 34.84 | 2019/9/28  | 2019/11/1  | 6.80  | 1.50  | 0.80                 | 5.20  | Z. Li et al. (2021)    |
| CN      | 111.71 | 34.79 | 2018/12/21 | 2019/1/21  | 17.92 | 5.91  | 5.91                 | 12.01 | Q. Wang et al. (2020)  |
| CN      | 111.03 | 32.38 | 2018/5/29  | 2018/6/14  | 9.86  | 1.89  | 1.89                 | 7.97  | Ou et al. (2023)       |
| CN      | 114.4  | 30.52 | 2019/10/3  | 2019/11/3  | 6.25  | 3.22  | 1.27                 | 3.03  | S. Li et al. (2022)    |
| CN      | 116.33 | 39.73 | 2018/8/16  | 2018/9/16  | 12.24 | 3.79  | 3.79                 | 8.44  | T. Chen et al. (2020)  |
| CN      | 116.33 | 39.73 | 2019/7/25  | 2019/8/21  | 9.30  | 2.90  | 2.90                 | 6.42  | T. Chen et al. (2021)  |
| CN      | 116.31 | 39.99 | 2017/12/16 | 2018/1/10  | 13.30 | 5.45  | 4.12                 | 7.98  | Zheng et al. (2023)    |
| CN      | 116.3  | 40    | 2019/1/18  | 2019/2/18  | 10.90 | 5.20  | 2.70                 | 6.10  | Hu et al. (2022)       |
| CN      | 116.31 | 39.99 | 2018/3/13  | 2018/4/5   | 32.90 | 9.00  | 5.80                 | 23.90 | Zheng et al. (2023)    |
| CN      | 116.37 | 39.97 | 2018/5/20  | 2018/6/23  | 12.70 | 3.70  | 1.70                 | 9.10  | W. Xu et al. (2021)    |
| CN      | 116.37 | 39.97 | 2018/7/1   | 2018/8/5   | 13.20 | 1.70  | 1.70                 | 11.30 | Z. J. Li et al. (2022) |
| CN      | 116.32 | 39.99 | 2015/8/15  | 2015/9/10  | 13.80 | 3.90  | 2.50                 | 9.80  | Duan et al. (2019)     |
| CN      | 116.31 | 39.99 | 2016/9/3   | 2016/10/4  | 22.00 | 6.00  | 3.00                 | 16.00 | Zheng et al. (2023)    |
| CN      | 116.37 | 39.97 | 2018/10/15 | 2018/11/30 | 20.50 | 5.90  | 2.20                 | 14.60 | Z. J. Li et al. (2022) |
| CN      | 116.37 | 39.97 | 2018/11/20 | 2018/12/25 | 15.10 | 8.60  | 4.90                 | 6.20  | W. Xu et al. (2021)    |
| CN      | 117.15 | 40.18 | 2020/4/8   | 2020/6/1   | 11.75 | 1.75  | 1.75                 | 9.95  | Wu et al. (2022)       |
| CN      | 118.97 | 37.75 | 2018/3/17  | 2018/4/12  | 7.90  | 2.60  | 2.60                 | 5.20  | Feng et al. (2023)     |
| CN      | 115.73 | 39.15 | 2019/12/10 | 2020/1/13  | 23.10 | 10.40 | 10.40                | 10.90 | W. Xu et al. (2021)    |
| CN      | 114.5  | 36.57 | 2019/8/10  | 2019/9/17  | 19.60 | 6.10  | 2.40                 | 14.50 | Gu et al. (2023)       |
| CN      | 119.4  | 35.18 | 2018/9/2   | 2018/9/29  | 8.32  | 0.67  | 0.67                 | 7.65  | Lei et al. (2020)      |
| CN      | 119.4  | 35.18 | 2019/3/2   | 2019/3/29  | 15.66 | 2.19  | 2.19                 | 13.31 | Lei et al. (2020)      |
| CN      | 116.96 | 39.8  | 2017/11/15 | 2018/2/1   | 24.00 | 18.24 | 18.24                | 6.00  | Y. Wang et al. (2020)  |
| CN      | 116.96 | 39.8  | 2017/10/3  | 2017/11/14 | 13.90 | 7.92  | 7.92                 | 5.98  | Wang et al. (2023)     |
| CN      | 117.67 | 40.4  | 2019/11/25 | 2019/12/25 | 4.80  | 1.10  | 1.10                 | 3.50  | J. Li et al. (2021)    |
| CN      | 117.67 | 40.4  | 2019/5/1   | 2019/5/31  | 4.50  | 0.70  | 0.70                 | 4.00  | J. Li et al. (2021)    |
| CN      | 117.67 | 40.4  | 2019/6/20  | 2019/7/26  | 4.90  | 0.00  | 0.00                 | 4.90  | J. Li et al. (2021)    |
| CN      | 117.67 | 40.4  | 2019/10/12 | 2019/11/12 | 4.50  | 0.60  | 0.60                 | 4.00  | J. Li et al. (2021)    |
| CN      | 114.37 | 37.18 | 2016/4/30  | 2016/6/20  | 11.59 | 2.54  | 1.27                 | 9.04  | Y. Zhang et al. (2018) |
| CN      | 113.9  | 35.3  | 2017/6/8   | 2017/6/25  | 18.00 | 4.32  | 4.32                 | 13.50 | H. Li et al. (2018)    |
| CN      | 113.92 | 35.28 | 2018/12/1  | 2019/1/15  | 22.58 | 10.29 | 10.29                | 12.28 | C. Chen et al. (2021)  |
| CN      | 107.14 | 34.35 | 2019/2/26  | 2019/3/27  | 16.02 | 6.41  | 4.17                 | 9.61  | Y. Wang et al. (2022)  |
| CN      | 104.13 | 35.95 | 2018/12/4  | 2019/1/6   | 10.50 | 5.00  | 5.00                 | 5.50  | C. Tang et al. (2022)  |
| CN      | 103.86 | 36.05 | 2020/1/14  | 2020/3/4   | 12.41 | 6.16  | 4.61                 | 6.24  | Xu et al. (2020)       |
| CN      | 108.35 | 34.07 | 2019/12/23 | 2020/2/7   | 12.57 | 4.14  | 4.14                 | 8.53  | Zhong et al. (2021)    |
| CN      | 109.02 | 34.34 | 2018/5/19  | 2018/6/18  | 7.50  | 1.51  | 0.46                 | 5.30  | Zhong et al. (2022)    |
| CN      | 108.89 | 34.22 | 2019/6/22  | 2019/7/21  | 14.00 | 4.40  | 1.80                 | 9.60  | Duan et al. (2021)     |
| CN      | 108.89 | 34.22 | 2018/12/4  | 2019/3/15  | 37.10 | 15.30 | 10.50                | 21.80 | Duan et al. (2022)     |
| CN      | 111.05 | 35.04 | 2020/11/1  | 2021/1/11  | 24.50 | 9.20  | 9.20                 | 15.30 | Y. Li et al. (2022)    |
| CN      | 109.49 | 18.84 | 2015/3/18  | 2015/4/15  | 4.90  | 0.00  | 0.00                 | 4.89  | Zhu et al. (2016)      |
| CN      | 117.02 | 23.42 | 2015/12/22 | 2016/1/16  | 7.06  | 2.61  | 2.61                 | 4.45  | Cao et al. (2019)      |
| CN      | 118.05 | 24.6  | 2015/5/1   | 2015/5/18  | 13.07 | 3.61  | 3.61                 | 9.46  | Cao et al. (2017)      |
| CN      | 118.05 | 24.6  | 2018/12/1  | 2018/12/22 | 8.42  | 2.39  | 2.39                 | 6.05  | Chen et al. (2022)     |
| CN      | 118.05 | 24.6  | 2018/8/1   | 2018/8/22  | 7.89  | 1.60  | 1.60                 | 6.30  | Chen et al. (2022)     |
| CN      | 113.37 | 23.15 | 2017/11/20 | 2018/1/5   | 17.30 | 5.36  | 2.25                 | 12.11 | Guo et al. (2020)      |
| CN      | 113.36 | 23.14 | 2018/10/1  | 2018/11/20 | 14.70 | 5.30  | 3.10                 | 9.70  | W. Chen et al. (2021)  |
| CN      | 113.33 | 23.06 | 2021/3/1   | 2021/5/31  | 11.44 | 4.05  | 1.20                 | 7.39  | Zhai et al. (2023)     |

|    |         |        |            |            |       |       |       |       |                          |
|----|---------|--------|------------|------------|-------|-------|-------|-------|--------------------------|
| CN | 113.33  | 23.06  | 2021/6/1   | 2021/8/31  | 7.76  | 2.53  | 0.59  | 5.23  | Zhai et al. (2023)       |
| CN | 114.18  | 22.3   | 2017/12/24 | 2018/1/15  | 6.80  | 2.35  | 1.12  | 4.45  | Liu et al. (2019)        |
| CN | 114.17  | 22.32  | 2017/3/31  | 2017/4/20  | 14.00 | 5.50  | 5.50  | 8.30  | Niu et al. (2021)        |
| CN | 114.253 | 22.209 | 2018/11/1  | 2018/11/30 | 5.39  | 0.73  | 0.73  | 4.65  | Huo et al. (2024)        |
| CN | 114.253 | 22.209 | 2020/9/29  | 2020/11/18 | 6.27  | 0.74  | 0.74  | 5.54  | Huo et al. (2024)        |
| CN | 113.9   | 22.6   | 2015/8/1   | 2015/8/31  | 10.00 | 2.97  | 2.97  | 7.03  | Yu et al. (2019)         |
| CN | 113.9   | 22.6   | 2015/11/4  | 2015/11/30 | 7.80  | 2.76  | 2.76  | 5.04  | Yu et al. (2019)         |
| CN | 113.9   | 22.6   | 2016/4/1   | 2016/4/30  | 4.30  | 1.81  | 1.81  | 2.49  | Yu et al. (2019)         |
| CN | 113.9   | 22.6   | 2018/12/12 | 2019/1/3   | 9.60  | 4.60  | 2.40  | 5.00  | Cao et al. (2022)        |
| CN | 113.9   | 22.6   | 2020/1/24  | 2020/2/24  | 8.67  | 1.93  | 1.93  | 6.75  | M.-X. Tang et al. (2022) |
| CN | 105.63  | 29.42  | 2021/1/25  | 2021/2/14  | 25.50 | 11.91 | 11.91 | 13.59 | Zhang et al. (2023)      |
| CN | 104.42  | 30.93  | 2021/12/18 | 2022/1/22  | 39.20 | 17.80 | 17.80 | 20.23 | Bao et al. (2023)        |
| CN | 105.63  | 29.42  | 2021/1/25  | 2021/2/14  | 25.50 | 11.91 | 11.91 | 13.59 | Zhang et al. (2023)      |
| CN | 90.95   | 30.77  | 2015/5/31  | 2015/7/1   | 1.36  | 0.00  | 0.00  | 1.36  | Xu et al. (2018)         |
| CN | 86.95   | 28.36  | 2016/4/12  | 2016/5/12  | 2.39  | 1.37  | 1.37  | 1.01  | X. Zhang et al. (2018)   |
| CN | 100.9   | 36.28  | 2017/7/1   | 2017/7/31  | 3.14  | 0.79  | 0.79  | 2.35  | Zhang et al. (2019)      |
| CN | 91.03   | 29.65  | 2019/8/31  | 2019/9/26  | 3.88  | 2.56  | 1.19  | 1.32  | Xu et al. (2024)         |
| CN | 96.51   | 39.5   | 2020/8/4   | 2020/8/29  | 0.69  | 0.00  | 0.00  | 0.69  | Xu et al. (2024)         |
| CN | 84.35   | 42.83  | 2021/8/29  | 2021/9/26  | 0.73  | 0.00  | 0.00  | 0.73  | Xu et al. (2024)         |
| CN | 95.32   | 29.3   | 2021/3/26  | 2021/5/22  | 3.25  | 0.53  | 0.53  | 2.72  | Xu et al. (2024)         |
| CN | 119.96  | 31.76  | 2020/11/3  | 2020/11/20 | 13.00 | 4.68  | 2.60  | 8.19  | Zhu et al. (2024)        |
| CN | 120.21  | 30.21  | 2016/8/5   | 2016/8/21  | 17.00 | 6.70  | 3.50  | 10.70 | K. Li et al. (2018)      |
| CN | 120.21  | 30.21  | 2016/9/7   | 2016/9/23  | 18.50 | 6.10  | 2.00  | 12.10 | K. Li et al. (2018)      |
| CN | 118.73  | 32.01  | 2015/4/13  | 2015/4/29  | 12.69 | 5.64  | 3.50  | 7.04  | Wang et al. (2016)       |
| CN | 118.75  | 32.04  | 2015/10/20 | 2015/11/19 | 25.20 | 7.06  | 7.06  | 18.14 | Zhang et al. (2017)      |
| CN | 118.95  | 32.12  | 2019/7/4   | 2019/7/31  | 10.10 | 2.18  | 2.18  | 7.92  | Ge et al. (2022)         |
| CN | 118.95  | 32.12  | 2019/10/2  | 2019/10/27 | 10.90 | 4.95  | 4.95  | 5.95  | Ge et al. (2022)         |
| CN | 118.95  | 32.12  | 2019/12/4  | 2019/12/28 | 18.00 | 9.94  | 9.94  | 8.06  | Ge et al. (2022)         |
| CN | 118.95  | 32.12  | 2020/4/2   | 2020/4/30  | 11.30 | 4.91  | 4.91  | 6.39  | Ge et al. (2022)         |
| CN | 118.86  | 31.92  | 2021/7/18  | 2021/8/26  | 13.08 | 3.96  | 1.82  | 9.12  | Xian et al. (2023)       |
| CN | 121.90  | 29.75  | 2018/1/23  | 2018/2/24  | 3.81  | 0.84  | 0.84  | 2.97  | Huang et al. (2021)      |
| CN | 120.99  | 31.10  | 2015/7/1   | 2015/8/31  | 9.48  | 2.79  | 2.79  | 6.77  | Zhao et al. (2020)       |
| CN | 120.99  | 31.10  | 2015/9/1   | 2015/11/30 | 13.22 | 3.79  | 3.79  | 9.43  | Zhao et al. (2020)       |
| CN | 120.99  | 31.10  | 2015/12/1  | 2016/2/29  | 18.09 | 4.76  | 4.76  | 13.04 | Zhao et al. (2020)       |
| CN | 120.99  | 31.10  | 2016/3/1   | 2016/5/31  | 12.44 | 2.80  | 2.80  | 9.78  | Zhao et al. (2020)       |
| CN | 120.99  | 31.10  | 2016/6/1   | 2016/6/30  | 10.87 | 2.65  | 2.65  | 8.32  | Zhao et al. (2020)       |
| CN | 121.43  | 31.17  | 2016/11/28 | 2017/1/13  | 13.00 | 6.40  | 2.20  | 6.60  | Zhu et al. (2021)        |
| CN | 121.43  | 31.17  | 2016/8/23  | 2016/9/10  | 13.80 | 5.40  | 2.10  | 8.40  | Zhu et al. (2021)        |
| CN | 121.43  | 31.17  | 2017/5/18  | 2017/6/4   | 9.80  | 5.30  | 2.60  | 4.50  | Zhu et al. (2021)        |
| CN | 121.43  | 31.17  | 2018/10/31 | 2018/12/2  | 9.44  | 4.80  | 1.90  | 4.65  | Cui et al. (2022)        |
| CN | 121.4   | 31.2   | 2018/1/10  | 2018/1/21  | 24.42 | 7.82  | 7.82  | 16.61 | Qian et al. (2023)       |
| KR | 127.55  | 38.02  | 2018/3/9   | 2018/3/29  | 14.24 | 3.67  | 3.67  | 10.57 | Song et al. (2021)       |
| KR | 127.55  | 38.02  | 2018/9/5   | 2018/9/15  | 3.50  | 1.05  | 1.05  | 2.45  | Song et al. (2021)       |
| KR | 127.55  | 38.02  | 2018/1/4   | 2018/2/20  | 9.04  | 2.59  | 2.59  | 6.45  | Song et al. (2021)       |
| KR | 127.05  | 37.6   | 2015/12/5  | 2016/1/21  | 12.10 | 7.14  | 4.72  | 4.96  | Kim et al. (2017)        |
| KR | 127.05  | 37.6   | 2016/4/14  | 2016/6/15  | 9.72  | 3.79  | 1.65  | 5.93  | Kim et al. (2018)        |
| KR | 127.05  | 37.6   | 2017/1/1   | 2017/2/10  | 13.63 | 6.17  | 3.99  | 7.46  | Kim et al. (2022)        |
| KR | 127.05  | 37.6   | 2019/2/22  | 2019/4/2   | 13.69 | 3.29  | 1.23  | 10.41 | Kim et al. (2020)        |

|    |        |       |            |            |       |       |       |       |                              |
|----|--------|-------|------------|------------|-------|-------|-------|-------|------------------------------|
| KR | 127.05 | 37.60 | 2019/6/12  | 2019/7/16  | 5.69  | 1.21  | 0.31  | 4.48  | Hu et al. (2024)             |
| IN | 72.6   | 23    | 2017/9/19  | 2017/10/20 | 9.00  | 3.78  | 3.78  | 5.22  | Singh et al. (2019)          |
| IN | 72.6   | 23    | 2020/6/1   | 2020/6/16  | 3.80  | 0.84  | 0.84  | 2.96  | Dave et al. (2021)           |
| IN | 72.6   | 23    | 2020/2/29  | 2020/3/23  | 8.60  | 3.10  | 3.10  | 5.50  | Dave et al. (2021)           |
| IN | 73.65  | 17.92 | 2016/6/1   | 2016/9/30  | 1.52  | 1.21  | 1.21  | 0.31  | Mukherjee et al. (2018)      |
| IN | 73.65  | 17.92 | 2016/3/17  | 2016/5/27  | 6.30  | 3.15  | 3.15  | 3.15  | Mukherjee et al. (2018)      |
| IN | 73.65  | 17.92 | 2016/12/1  | 2017/2/28  | 7.02  | 3.44  | 3.44  | 3.58  | Mukherjee et al. (2018)      |
| IN | 73.65  | 17.92 | 2021/2/6   | 2021/2/26  | 10.51 | 2.63  | 2.63  | 7.88  | Mukherjee et al. (2025)      |
| IN | 73.65  | 17.92 | 2016/10/1  | 2016/11/30 | 2.57  | 0.83  | 0.83  | 1.74  | Mukherjee et al. (2018)      |
| IN | 73.81  | 18.54 | 2020/12/1  | 2021/2/28  | 22.10 | 9.06  | 9.06  | 13.04 | Vispute et al. (2025)        |
| IN | 73.81  | 18.54 | 2020/10/1  | 2020/11/30 | 7.80  | 3.35  | 3.35  | 4.45  | Vispute et al. (2025)        |
| IN | 73.81  | 18.54 | 2020/6/1   | 2020/9/30  | 2.40  | 0.86  | 0.86  | 1.54  | Vispute et al. (2025)        |
| IN | 73.81  | 18.54 | 2020/3/10  | 2020/3/24  | 10.16 | 3.62  | 3.62  | 6.54  | Acharja et al. (2022)        |
| IN | 77.28  | 28.45 | 2018/1/27  | 2018/3/15  | 32.43 | 14.45 | 14.45 | 17.98 | Lalchandani et al. (2021)    |
| IN | 80.3   | 26.5  | 2015/5/24  | 2015/8/15  | 7.27  | 1.15  | 1.15  | 6.12  | Chakraborty et al. (2016)    |
| IN | 85.8   | 20.2  | 2016/10/1  | 2016/11/30 | 5.98  | 2.15  | 2.15  | 3.83  | Kompalli et al. (2023)       |
| IN | 77.17  | 28.62 | 2018/2/17  | 2018/3/15  | 55.00 | 28.60 | 28.60 | 26.40 | Lalchandani et al. (2021)    |
| IN | 77.17  | 28.63 | 2019/11/1  | 2020/1/8   | 57.05 | 26.99 | 26.99 | 30.06 | Lalchandani et al. (2022)    |
| IN | 77.19  | 28.54 | 2018/1/17  | 2018/3/11  | 65.30 | 31.34 | 31.34 | 33.96 | Lalchandani et al. (2021)    |
| IN | 77.2   | 28.58 | 2018/2/16  | 2018/5/26  | 42.83 | 20.65 | 20.65 | 22.18 | Tobler et al. (2020)         |
| IN | 77.19  | 28.54 | 2019/5/31  | 2019/7/26  | 12.18 | 4.40  | 3.50  | 7.78  | Shukla et al. (2021)         |
| IN | 77.23  | 28.66 | 2018/8/3   | 2018/8/18  | 25.22 | 11.68 | 8.87  | 13.54 | Cash et al. (2021)           |
| IN | 77.19  | 28.54 | 2017/7/1   | 2017/9/15  | 23.00 | 6.67  | 3.22  | 16.33 | Bhandari et al. (2022)       |
| IN | 77.19  | 28.54 | 2019/9/25  | 2019/10/29 | 27.51 | 11.96 | 11.96 | 15.55 | Lalchandani et al. (2022)    |
| IN | 77.22  | 28.59 | 2018/11/6  | 2018/11/20 | 73.23 | 39.69 | 39.69 | 33.54 | Reyes-Villegas et al. (2021) |
| IN | 77.19  | 28.54 | 2019/11/14 | 2020/1/8   | 50.52 | 33.87 | 33.87 | 16.65 | Lalchandani et al. (2022)    |

**Table S9.** Global budgets for OA, POA, and SOA for the year 2018 from the “WDLuo” simulation run.

|     | Net production<br>(Tg yr <sup>-1</sup> ) | Dry deposition<br>(Tg yr <sup>-1</sup> ) | Wet deposition<br>(Tg yr <sup>-1</sup> ) | Burden<br>(Tg) | Lifetime<br>(days) |
|-----|------------------------------------------|------------------------------------------|------------------------------------------|----------------|--------------------|
| POA | 23.0                                     | 3.5                                      | 19.5                                     | 0.3            | 5.2                |
| SOA | 105.6                                    | 9.5                                      | 96.1                                     | 1.4            | 4.6                |
| OA  | 128.6                                    | 13.0                                     | 115.6                                    | 1.7            | 4.7                |

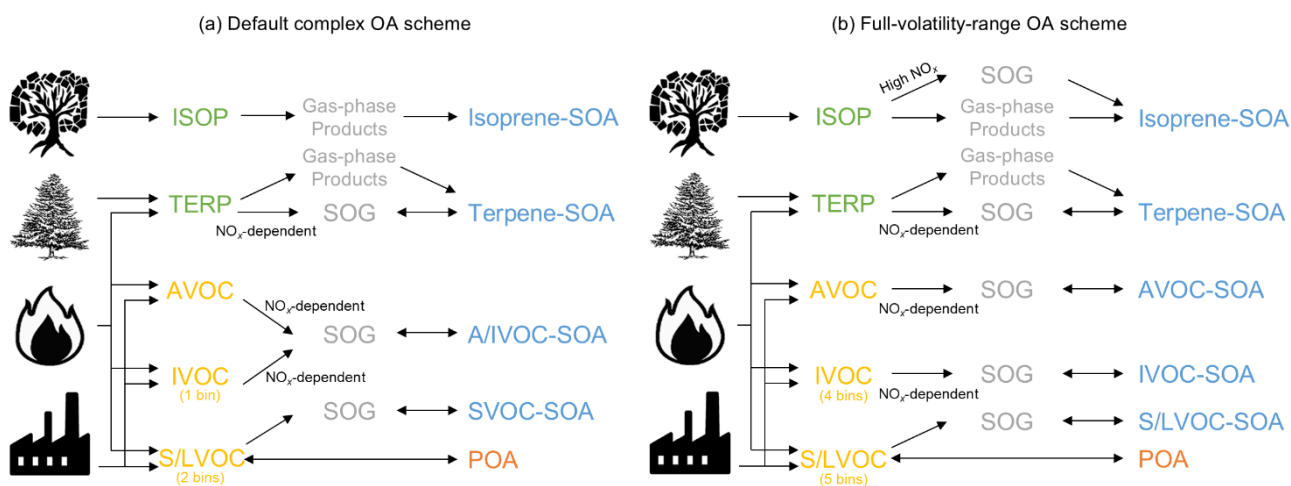

**Figure S1.** The schematics of the (a) default complex OA and (b) full-volatility-range OA schemes.

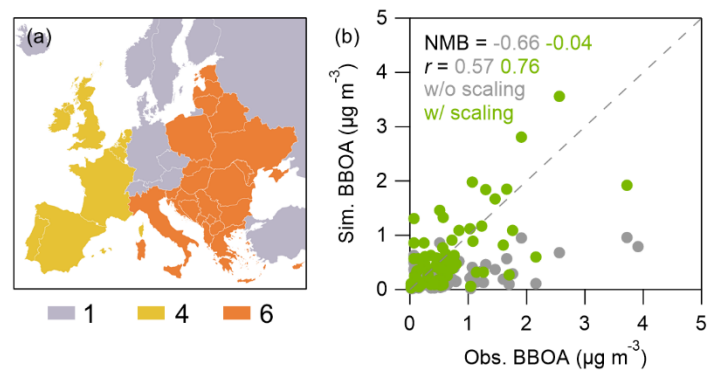

**Figure S2.** (a) Empirical scalars for modifying S/LVOC emissions from residential biofuel combustion in different European countries. (b) Scatterplots of the observed-derived and simulated concentrations of BBOA in Europe without and with scaling S/LVOC emissions from residential biofuel combustion.

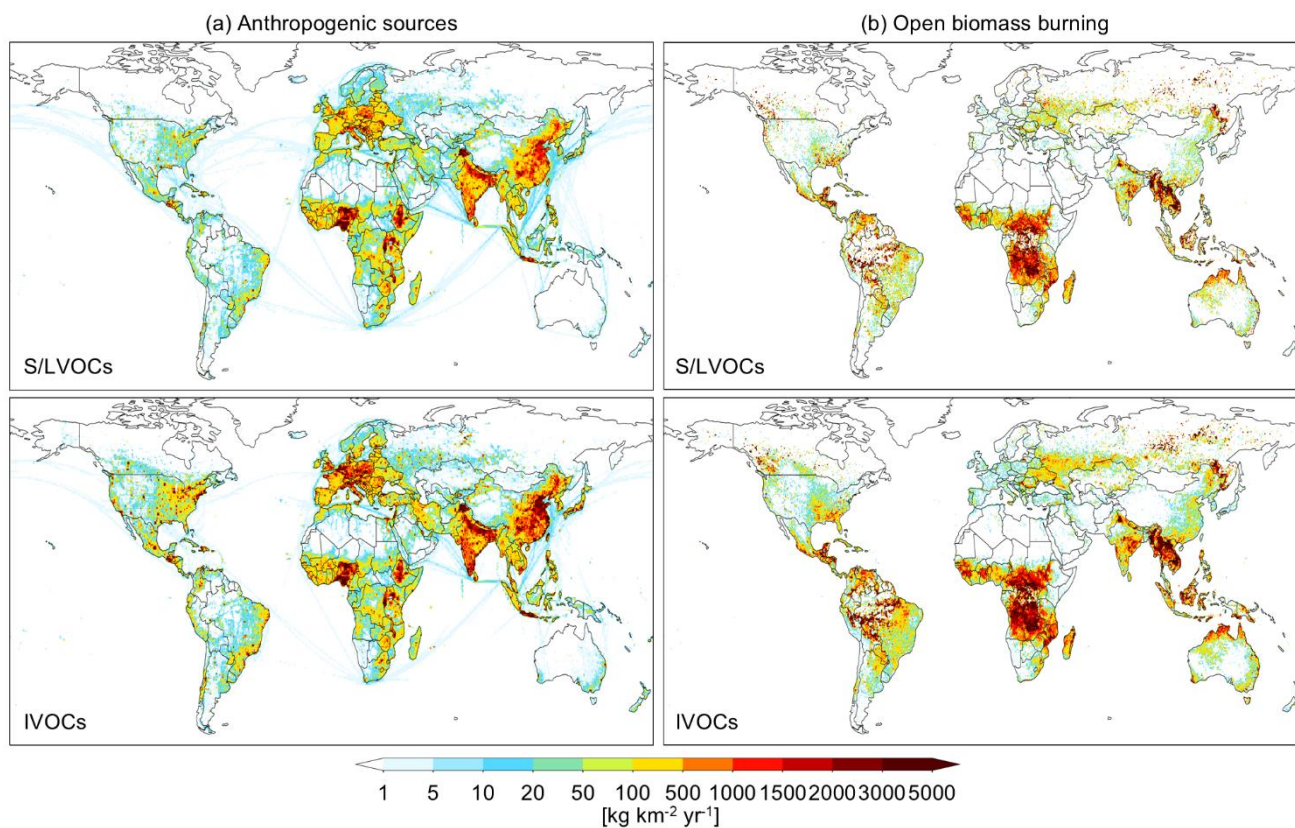

**Figure S3.** Annual emissions of S/LVOCs and IVOCs from (a) anthropogenic sources and (b) open biomass burning in the year 2018 (“Base”).

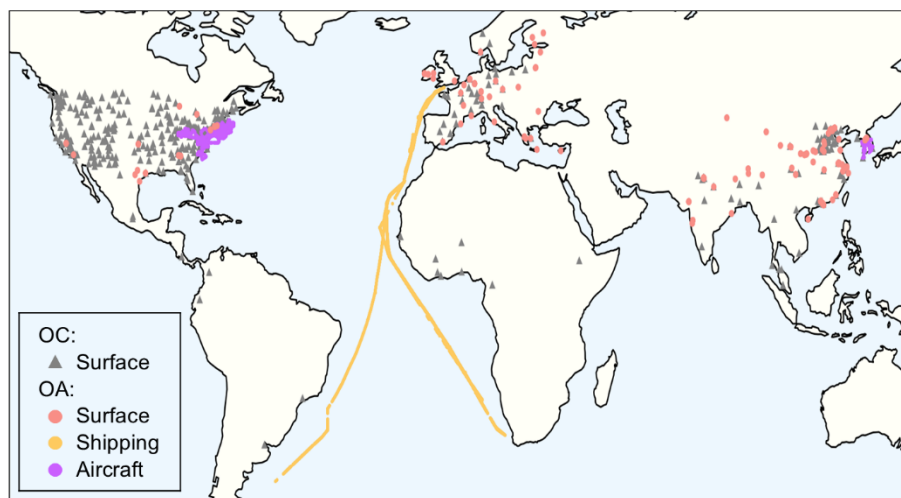

**Figure S4.** Locations of surface OC and OA measurements and tracks of the shipborne and airborne field campaigns for OA. The OC measurements in the US are adopted from the Interagency Monitoring of Protected Visual Environments (IMPROVE) and the Chemical Speciation Network (CSN) for the year of 2018, which are downloaded from <http://views.cira.colostate.edu/fed/>. The OC measurements in the Europe are provided by EBAS (<https://ebas-data.nilu.no/>) from 2016 to 2021. The OC measurements in the China are adopted from the China National Environmental Monitoring Centre (CNEMC) and other research sites from 2017 to 2020 (Chen et al., 2024). The International Network to study Deposition and Atmospheric composition in Africa (INDAAF) also provides the OC measurements in Africa from 2018 to 2019 (<https://indaaf.obs-mip.fr/>).

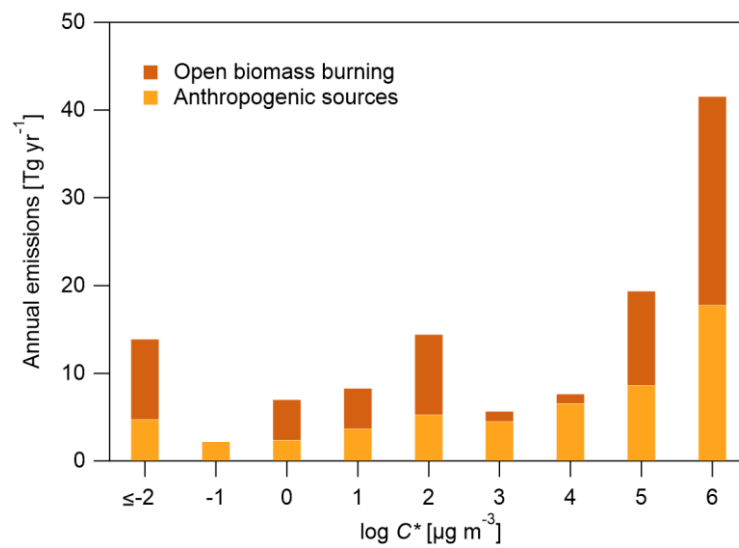

**Figure S5.** Global emissions of S/LVOCs and IVOCs from anthropogenic sources and open biomass burning in each volatility bin.

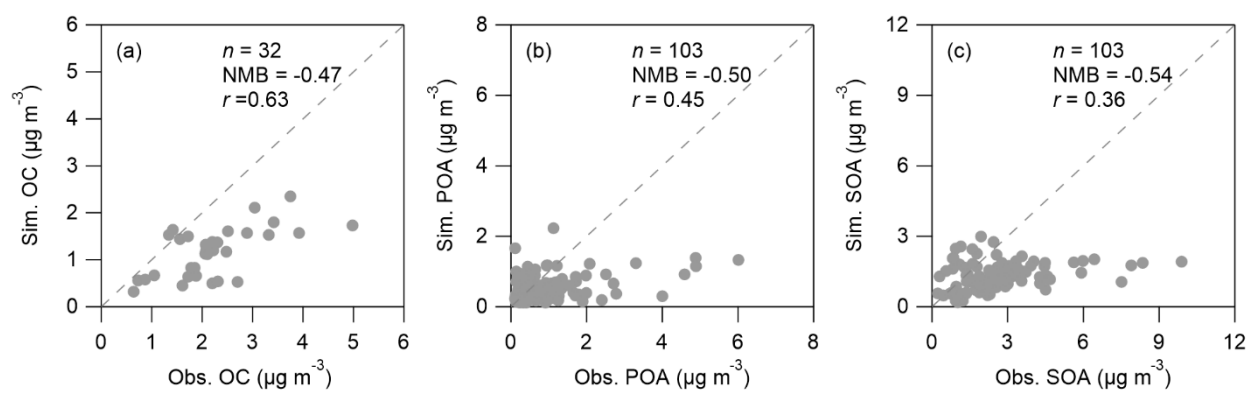

**Figure S6.** Scatterplots of the observed-derived and simulated concentrations of (a-c) OC, POA, and SOA in Europe without the residential biofuel correction.

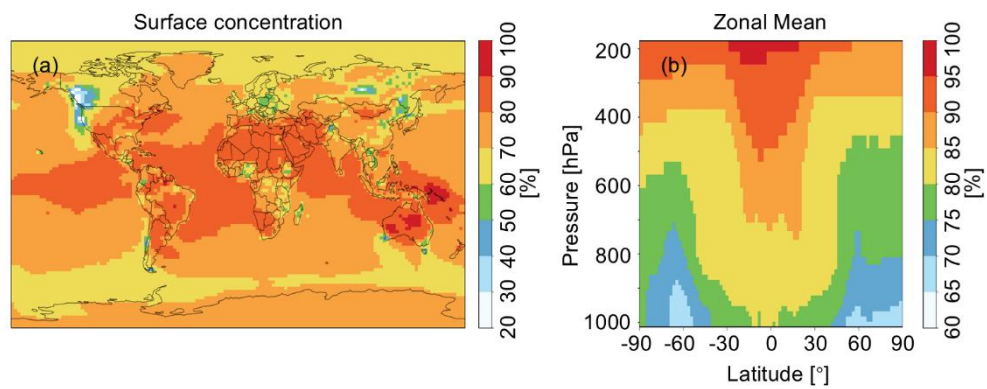

**Figure S7.** (a) Surface and (b) zonal mean annual-averaged fraction of SOA in OA.

## References

- Acharja, P., Vispute, A., Lonkar, P., Gosavi, S. W., Debnath, S., Dhangar, N. G., Ali, K., Govardhan, G., and Ghude, S. D.: Size-resolved Compositional Analysis and Source Apportionment of Submicron Aerosol during Lockdown Period Using HR-ToF-AMS, *Aerosol and Air Quality Research*, 22, 220108, <https://doi.org/10.4209/aaqr.220108>, 2022.
- Afzal, A., Farooq, A., Ashraf, F., Amir, S., Seo, S.-J., Park, J.-M., Babar, Z. B., and Park, J.-H.: Chemical characterization and source identification of PM<sub>2.5</sub> at Baengnyeongdo Island, South Korea: Three-year dynamics (2019–2021), *Air Quality, Atmosphere & Health*, <https://doi.org/10.1007/s11869-025-01854-w>, 2025.
- Al-Naiema, I. M., Hettiyadura, A. P. S., Wallace, H. W., Sanchez, N. P., Madler, C. J., Cevik, B. K., Bui, A. A. T., Kettler, J., Griffin, R. J., and Stone, E. A.: Source apportionment of fine particulate matter in Houston, Texas: insights to secondary organic aerosols, *Atmos. Chem. Phys.*, 18, 15601-15622, <https://doi.org/10.5194/acp-18-15601-2018>, 2018.
- Avery, Anita M., Waring, M. S., and DeCarlo, P. F.: Seasonal variation in aerosol composition and concentration upon transport from the outdoor to indoor environment, *Environmental Science: Processes & Impacts*, 21, 528-547, <https://doi.org/10.1039/C8EM00471D>, 2019.
- Bao, Z., Zhang, X., Li, Q., Zhou, J., Shi, G., Zhou, L., Yang, F., Xie, S., Zhang, D., Zhai, C., Li, Z., Peng, C., and Chen, Y.: Measurement report: Intensive biomass burning emissions and rapid nitrate formation drive severe haze formation in the Sichuan Basin, China – insights from aerosol mass spectrometry, *Atmos. Chem. Phys.*, 23, 1147-1167, <https://doi.org/10.5194/acp-23-1147-2023>, 2023.
- Bhandari, S., Arub, Z., Habib, G., Apte, J. S., and Hildebrandt Ruiz, L.: Contributions of primary sources to submicron organic aerosols in Delhi, India, *Atmos. Chem. Phys.*, 22, 13631-13657, <https://doi.org/10.5194/acp-22-13631-2022>, 2022.
- Bhowmik, H. S., Naresh, S., Bhattu, D., Rastogi, N., Prévôt, A. S. H., and Tripathi, S. N.: Temporal and spatial variability of carbonaceous species (EC; OC; WSOC and SOA) in PM<sub>2.5</sub> aerosol over five sites of Indo-Gangetic Plain, *Atmospheric Pollution Research*, 12, 375-390, <https://doi.org/10.1016/j.apr.2020.09.019>, 2021.
- Bui, A. A. T., Wallace, H. W., Kavassalis, S., Alwe, H. D., Flynn, J. H., Erickson, M. H., Alvarez, S., Millet, D. B., Steiner, A. L., and Griffin, R. J.: Transport-driven aerosol differences above and below the canopy of a mixed deciduous forest, *Atmos. Chem. Phys.*, 21, 17031-17050, <https://doi.org/10.5194/acp-21-17031-2021>, 2021.
- Cao, L.-M., Wei, J., He, L.-Y., Zeng, H., Li, M.-L., Zhu, Q., Yu, G.-H., and Huang, X.-F.: Aqueous aging of secondary organic aerosol coating onto black carbon: Insights from simultaneous L-ToF-AMS and SP-AMS measurements at an urban site in southern China, *Journal of Cleaner Production*, 330, 129888, <https://doi.org/10.1016/j.jclepro.2021.129888>, 2022.
- Cao, L., Zhu, Q., Huang, X., Deng, J., Chen, J., Hong, Y., Xu, L., and He, L.: Chemical characterization and source apportionment of atmospheric submicron particles on the western coast of Taiwan Strait, China, *Journal of Environmental Sciences*, 52, 293-304, <https://doi.org/10.1016/j.jes.2016.09.018>, 2017.
- Cao, L. M., Huang, X. F., Wang, C., Zhu, Q., and He, L. Y.: Characterization of submicron aerosol volatility in the regional atmosphere in Southern China, *Chemosphere*, 236, 124383, <https://doi.org/10.1016/j.chemosphere.2019.124383>, 2019.
- Cash, J. M., Langford, B., Di Marco, C., Mullinger, N. J., Allan, J., Reyes-Villegas, E., Joshi, R., Heal, M. R., Acton, W. J. F., Hewitt, C. N., Misztal, P. K., Drysdale, W., Mandal, T. K., Shivani, Gadi, R., Gurjar, B. R., and Nemitz, E.: Seasonal analysis of submicron aerosol in Old Delhi using high-resolution aerosol mass spectrometry: chemical characterisation, source apportionment and new marker identification, *Atmos. Chem. Phys.*, 21, 10133-10158, <https://doi.org/10.5194/acp-21-10133-2021>, 2021.

Chaisongkaew, P., Dejchanchaiwong, R., Inerb, M., Mahasakpan, N., Nim, N., Samae, H., Intra, P., Morris, J., Ingviya, T., Limna, T., and Tekasakul, P.: Source apportionment of PM<sub>2.5</sub> in Thailand's deep south by principal component analysis and impact of transboundary haze, *Environmental Science and Pollution Research*, 30, 89180-89196, <https://doi.org/10.1007/s11356-023-28419-7>, 2023.

Chakraborty, A., Gupta, T., and Tripathi, S. N.: Chemical composition and characteristics of ambient aerosols and rainwater residues during Indian summer monsoon: Insight from aerosol mass spectrometry, *Atmospheric Environment*, 136, 144-155, <https://doi.org/10.1016/j.atmosenv.2016.04.024>, 2016.

Chen, C.-L., Chen, S., Russell, L. M., Liu, J., Price, D. J., Betha, R., Sanchez, K. J., Lee, A. K. Y., Williams, L., Collier, S. C., Zhang, Q., Kumar, A., Kleeman, M. J., Zhang, X., and Cappa, C. D.: Organic Aerosol Particle Chemical Properties Associated With Residential Burning and Fog in Wintertime San Joaquin Valley (Fresno) and With Vehicle and Firework Emissions in Summertime South Coast Air Basin (Fontana), *Journal of Geophysical Research: Atmospheres*, 123, 10,707-710,731, <https://doi.org/10.1029/2018JD028374>, 2018.

Chen, C., Zhang, H., Yan, W., Wu, N., Zhang, Q., and He, K.: Aerosol water content enhancement leads to changes in the major formation mechanisms of nitrate and secondary organic aerosols in winter over the North China Plain, *Environmental Pollution*, 287, 117625, <https://doi.org/10.1016/j.envpol.2021.117625>, 2021.

Chen, Q., Miao, R., Geng, G., Shrivastava, M., Dao, X., Xu, B., Sun, J., Zhang, X., Liu, M., Tang, G., Tang, Q., Hu, H., Huang, R.-J., Wang, H., Zheng, Y., Qin, Y., Guo, S., Hu, M., and Zhu, T.: Widespread 2013-2020 decreases and reduction challenges of organic aerosol in China, *Nat. Commun.*, 15, 4465, <https://doi.org/10.1038/s41467-024-48902-0>, 2024.

Chen, T., Liu, J., Liu, Y., Ma, Q., Ge, Y., Zhong, C., Jiang, H., Chu, B., Zhang, P., Ma, J., Liu, P., Wang, Y., Mu, Y., and He, H.: Chemical characterization of submicron aerosol in summertime Beijing: A case study in southern suburbs in 2018, *Chemosphere*, 247, 125918, <https://doi.org/10.1016/j.chemosphere.2020.125918>, 2020.

Chen, T., Liu, J., Ma, Q., Chu, B., Zhang, P., Ma, J., Liu, Y., Zhong, C., Liu, P., Wang, Y., Mu, Y., and He, H.: Measurement report: Effects of photochemical aging on the formation and evolution of summertime secondary aerosol in Beijing, *Atmos. Chem. Phys.*, 21, 1341-1356, <https://doi.org/10.5194/acp-21-1341-2021>, 2021.

Chen, W., Ye, Y. Q., Hu, W. W., Zhou, H. S., Pan, T. L., Wang, Y. K., Song, W., Song, Q. C., Ye, C. S., Wang, C. M., Wang, B. L., Huang, S., Yuan, B., Zhu, M., Lian, X. F., Zhang, G. H., Bi, X. H., Jiang, F., Liu, J. W., Canonaco, F., Prevot, A. S. H., Shao, M., and Wang, X. M.: Real-Time Characterization of Aerosol Compositions, Sources, and Aging Processes in Guangzhou During PRIDE-GBA 2018 Campaign, *J. Geophys. Res. Atmos.*, 126, e2021JD035114, <https://doi.org/ARTN e2021JD035114>, 10.1029/2021JD035114, 2021.

Chen, Y., Takeuchi, M., Nah, T., Xu, L., Canagaratna, M. R., Stark, H., Baumann, K., Canonaco, F., Prévôt, A. S. H., Huey, L. G., Weber, R. J., and Ng, N. L.: Chemical characterization of secondary organic aerosol at a rural site in the southeastern US: insights from simultaneous high-resolution time-of-flight aerosol mass spectrometer (HR-ToF-AMS) and FIGAERO chemical ionization mass spectrometer (CIMS) measurements, *Atmos. Chem. Phys.*, 20, 8421-8440, <https://doi.org/10.5194/acp-20-8421-2020>, 2020.

Chen, Y. P., Yang, C., Xu, L. L., Chen, J. S., Zhang, Y. R., Shi, J. Y., Fan, X. L., Zheng, R. H., Hong, Y. W., and Li, M. R.: Chemical composition of NR-PM<sub>1</sub> in a coastal city of Southeast China: Temporal variations and formation pathways, *Atmospheric Environment*, 285, 119243, <https://doi.org/ARTN 119243>, 10.1016/j.atmosenv.2022.119243, 2022.

- Choi, S.-Y., Lee, H.-J., Park, S.-W., and Han, Y.-J.: Enhanced PM<sub>2.5</sub> episodes in a small residential city of South Korea: Effects of biomass burning and secondary formations, *Atmospheric Pollution Research*, 13, 101562, <https://doi.org/10.1016/j.apr.2022.101562>, 2022.
- ChooChuay, C., Pongpiachan, S., Tipmanee, D., Deelaman, W., Suttinun, O., Wang, Q., Xing, L., Li, G., Han, Y., Palakun, J., Poshyachinda, S., Aukkaravittayapun, S., Surapipith, V., and Cao, J.: Long-range Transboundary Atmospheric Transport of Polycyclic Aromatic Hydrocarbons, Carbonaceous Compositions, and Water-soluble Ionic Species in Southern Thailand, *Aerosol and Air Quality Research*, 20, 1591-1606, <https://doi.org/10.4209/aaqr.2020.03.0120>, 2020.
- Chow, W. S., Liao, K., Huang, X. H. H., Leung, K. F., Lau, A. K. H., and Yu, J. Z.: Measurement report: The 10-year trend of PM<sub>2.5</sub> major components and source tracers from 2008 to 2017 in an urban site of Hong Kong, China, *Atmos. Chem. Phys.*, 22, 11557-11577, <https://doi.org/10.5194/acp-22-11557-2022>, 2022.
- Costabile, F., Alas, H., Aufderheide, M., Avino, P., Amato, F., Argentini, S., Barnaba, F., Berico, M., Bernardoni, V., Biondi, R., Casasanta, G., Ciampichetti, S., Calzolari, G., Canepari, S., Conidi, A., Cordelli, E., Di Ianni, A., Di Liberto, L., Facchini, M. C., Facci, A., Frasca, D., Gilardoni, S., Grollino, M. G., Gualtieri, M., Lucarelli, F., Malaguti, A., Manigrasso, M., Montagnoli, M., Nava, S., Perrino, C., Padoan, E., Petenko, I., Querol, X., Simonetti, G., Tranfo, G., Ubertini, S., Valli, G., Valentini, S., Vecchi, R., Volpi, F., Weinhold, K., Wiedensohler, A., Zanini, G., Gobbi, G. P., and Petralia, E.: First Results of the “Carbonaceous Aerosol in Rome and Environs (CARE)” Experiment: Beyond Current Standards for PM<sub>10</sub>, *Atmosphere*, 8, 249, 2017.
- Cui, S., Huang, D. D., Wu, Y., Wang, J., Shen, F., Xian, J., Zhang, Y., Wang, H., Huang, C., Liao, H., and Ge, X.: Chemical properties, sources and size-resolved hygroscopicity of submicron black-carbon-containing aerosols in urban Shanghai, *Atmos. Chem. Phys.*, 22, 8073-8096, <https://doi.org/10.5194/acp-22-8073-2022>, 2022.
- Dave, J., Meena, R., Singh, A., and Rastogi, N.: Effect of COVID-19 lockdown on the concentration and composition of NR-PM<sub>2.5</sub> over Ahmedabad, a big city in western India, *Urban Climate*, 37, 100818, <https://doi.org/10.1016/j.uclim.2021.100818>, 2021.
- Dawidowski, L., Gelman Constantin, J., Herrera Murillo, J., Gómez-Marín, M., Nogueira, T., Blanco Jiménez, S., Díaz-Suárez, V., Baraldo Victorica, F., Lichtig, P., Díaz Resquin, M., Vargas-Rojas, M., Murillo-Hernández, J., Vergara Correa, J. A., de Fatima Andrade, M., Monteiro dos Santos, D., Flores Maldonado, J., Aldape, F., Abreu, L. F., and Manousakas, M. I.: Carbonaceous fraction in PM<sub>2.5</sub> of six Latin American cities: Seasonal variations, sources and secondary organic carbon contribution, *Science of The Total Environment*, 948, 174630, <https://doi.org/10.1016/j.scitotenv.2024.174630>, 2024.
- Ding, J., Huang, W., Zhao, J., Li, L., Xiong, G., Jiang, C., Ye, D., Li, D., Wang, J., Yu, J., and Liu, R.: Characteristics and source origins of carbonaceous aerosol in fine particulate matter in a megacity, Sichuan Basin, southwestern China, *Atmospheric Pollution Research*, 13, 101266, <https://doi.org/10.1016/j.apr.2021.101266>, 2022.
- Djossou, J., Léon, J. F., Akpo, A. B., Lioussé, C., Yoboué, V., Bedou, M., Bodjrenou, M., Chiron, C., Galy-Lacaux, C., Gardrat, E., Abbey, M., Keita, S., Bahino, J., Touré N'Datchoh, E., Osohou, M., and Awanou, C. N.: Mass concentration, optical depth and carbon composition of particulate matter in the major southern West African cities of Cotonou (Benin) and Abidjan (Côte d'Ivoire), *Atmos. Chem. Phys.*, 18, 6275-6291, <https://doi.org/10.5194/acp-18-6275-2018>, 2018.
- Duan, J., Huang, R.-J., Lin, C. S., Dai, W. T., Wang, M., Gu, Y. F., Wang, Y., Zhong, H. B., Zheng, Y., Ni, H. Y., Dusek, U., Chen, Y., Li, Y. J., Chen, Q., Worsnop, D. R., O'Dowd, C. D., and Cao, J. J.: Distinctions in source regions and formation mechanisms of secondary aerosol in Beijing from summer to winter, *Atmos Chem Phys*, 19, 10319-10334, <https://doi.org/10.5194/acp-19-10319-2019>, 2019.

- Duan, J., Huang, R. J., Gu, Y., Lin, C., Zhong, H., Wang, Y., Yuan, W., Ni, H., Yang, L., Chen, Y., Worsnop, D. R., and O'Dowd, C.: The formation and evolution of secondary organic aerosol during summer in Xi'an: Aqueous phase processing in fog-rain days, *Sci Total Environ*, 756, 144077, <https://doi.org/10.1016/j.scitotenv.2020.144077>, 2021.
- Duan, J., Huang, R. J., Gu, Y., Lin, C., Zhong, H., Xu, W., Liu, Q., You, Y., Ovadnevaite, J., Ceburnis, D., Hoffmann, T., and O'Dowd, C.: Measurement report: Large contribution of biomass burning and aqueous-phase processes to the wintertime secondary organic aerosol formation in Xi'an, Northwest China, *Atmos. Chem. Phys.*, 22, 10139-10153, <https://doi.org/10.5194/acp-22-10139-2022>, 2022.
- Feng, T., Wang, Y., Hu, W., Zhu, M., Song, W., Chen, W., Sang, Y., Fang, Z., Deng, W., Fang, H., Yu, X., Wu, C., Yuan, B., Huang, S., Shao, M., Huang, X., He, L., Lee, Y. R., Huey, L. G., Canonaco, F., Prevot, A. S. H., and Wang, X.: Impact of aging on the sources, volatility, and viscosity of organic aerosols in Chinese outflows, *Atmos. Chem. Phys.*, 23, 611-636, <https://doi.org/10.5194/acp-23-611-2023>, 2023.
- Florou, K., Liangou, A., Kaltsonoudis, C., Louvaris, E., Tasoglou, A., Patoulias, D., Kouvarakis, G., Kalivitis, N., Kourtchev, I., Kalberer, M., Tsagkaraki, M., Mihalopoulos, N., and Pandis, S. N.: Chemical characterization and sources of background aerosols in the eastern Mediterranean, *Atmospheric Environment*, 324, 120423, <https://doi.org/10.1016/j.atmosenv.2024.120423>, 2024.
- Ge, D., Nie, W., Sun, P., Liu, Y., Wang, T., Wang, J., Wang, J., Wang, L., Zhu, C., Wang, R., Liu, T., Chi, X., and Ding, A.: Characterization of particulate organic nitrates in the Yangtze River Delta, East China, using the time-of-flight aerosol chemical speciation monitor, *Atmospheric Environment*, 272, 118927, <https://doi.org/10.1016/j.atmosenv.2021.118927>, 2022.
- Gnamien, S., Lioussé, C., Keita, S., Silué, S., Bahino, J., Gardrat, E., Kassamba-Diaby, M., Ochou, A., and Yoboué, V.: Chemical characterization of urban aerosols in Abidjan and Korhogo (Côte d'Ivoire) from 2018 to 2020 and the identification of their potential emission sources, *Environmental Science: Atmospheres*, 3, 1741-1757, <https://doi.org/10.1039/D3EA00131H>, 2023.
- Gu, Y., Huang, R. J., Duan, J., Xu, W., Lin, C., Zhong, H., Wang, Y., Ni, H., Liu, Q., Xu, R., Wang, L., and Li, Y. J.: Multiple pathways for the formation of secondary organic aerosol in the North China Plain in summer, *Atmos. Chem. Phys.*, 23, 5419-5433, <https://doi.org/10.5194/acp-23-5419-2023>, 2023.
- Guo, F., Bui, A. A. T., Schulze, B. C., Dai, Q., Yoon, S., Shrestha, S., Wallace, H. W., Sanchez, N. P., Alvarez, S., Erickson, M. H., Sheesley, R. J., Usenko, S., Flynn, J., and Griffin, R. J.: Airmass history, night-time particulate organonitrates, and meteorology impact urban SOA formation rate, *Atmospheric Environment*, 322, 120362, <https://doi.org/10.1016/j.atmosenv.2024.120362>, 2024.
- Guo, J., Zhou, S., Cai, M., Zhao, J., Song, W., Zhao, W., Hu, W., Sun, Y., He, Y., Yang, C., Xu, X., Zhang, Z., Cheng, P., Fan, Q., Hang, J., Fan, S., Wang, X., and Wang, X.: Characterization of submicron particles by time-of-flight aerosol chemical speciation monitor (ToF-ACSM) during wintertime: aerosol composition, sources, and chemical processes in Guangzhou, China, *Atmos. Chem. Phys.*, 20, 7595-7615, <https://doi.org/10.5194/acp-20-7595-2020>, 2020.
- Hass-Mitchell, T., Joo, T., Rogers, M., Nault, B. A., Soong, C., Tran, M., Seo, M., Machesky, J. E., Canagaratna, M., Roscioli, J., Clafin, M. S., Lerner, B. M., Blomdahl, D. C., Misztal, P. K., Ng, N. L., Dillner, A. M., Bahreini, R., Russell, A., Krechmer, J. E., Lambe, A., and Gentner, D. R.: Increasing Contributions of Temperature-Dependent Oxygenated Organic Aerosol to Summertime Particulate Matter in New York City, *ACS ES&T Air*, 1, 113-128, <https://doi.org/10.1021/acsestair.3c00037>, 2024.

- Hatch, L. E., Yokelson, R. J., Stockwell, C. E., Veres, P. R., Simpson, I. J., Blake, D. R., Orlando, J. J., and Barsanti, K. C.: Multi-instrument comparison and compilation of non-methane organic gas emissions from biomass burning and implications for smoke-derived secondary organic aerosol precursors, *Atmos. Chem. Phys.*, 17, 1471-1489, <https://doi.org/10.5194/acp-17-1471-2017>, 2017.
- Hu, Q., Moon, J., and Kim, H.: Understanding the Driving Forces of Summer PM<sub>1</sub> Composition in Seoul, Korea, with Explainable Machine Learning, *ACS ES&T Air*, <https://doi.org/10.1021/acsestair.3c00116>, 2024.
- Hu, R., Wang, S., Zheng, H., Zhao, B., Liang, C., Chang, X., Jiang, Y., Yin, R., Jiang, J., and Hao, J.: Variations and Sources of Organic Aerosol in Winter Beijing under Markedly Reduced Anthropogenic Activities During COVID-2019, *Environ Sci Technol*, 56, 6956-6967, <https://doi.org/10.1021/acs.est.1c05125>, 2022.
- Huang, F., Zhou, J. B., Chen, N., Li, Y. H., Li, K., and Wu, S. P.: Chemical characteristics and source apportionment of PM<sub>2.5</sub> in Wuhan, China, *J Atmos Chem*, 76, 245-262, <https://doi.org/10.1007/s10874-019-09395-0>, 2019.
- Huang, X., Yu, H., Tong, L., Yang, M., Shen, F., Wu, Y., Nie, D., Cai, Q., Dai, X., Ge, X., and Xiao, H.: Real-time non-refractory PM<sub>1</sub> chemical composition, size distribution and source apportionment at a coastal industrial park in the Yangtze River Delta region, China, *Sci Total Environ*, 763, 142968, <https://doi.org/10.1016/j.scitotenv.2020.142968>, 2021.
- Huo, Y., Yao, D., and Guo, H.: Differences in aerosol chemistry at a regional background site in Hong Kong before and during the COVID-19 pandemic, *Science of The Total Environment*, 926, 171990, <https://doi.org/10.1016/j.scitotenv.2024.171990>, 2024.
- Hwang, K., Kim, J., Lee, J. Y., Park, J.-S., Park, S., Lee, G., Kim, C. H., Kim, P., Shin, S. H., Lee, K. Y., An, J.-Y., Park, J., and Kim, J. B.: Physicochemical characteristics and seasonal variations of PM<sub>2.5</sub> in urban, industrial, and suburban areas in South Korea, *Asian Journal of Atmospheric Environment*, 17, 19, <https://doi.org/10.1007/s44273-023-00018-5>, 2023.
- Jamhari, A. A., Latif, M. T., Wahab, M. I. A., Hassan, H., Othman, M., Abd Hamid, H. H., Tekasakul, P., Phairuang, W., Hata, M., Furuchi, M., and Rajab, N. F.: Seasonal variation and size distribution of inorganic and carbonaceous components, source identification of size-fractionated urban air particles in Kuala Lumpur, Malaysia, *Chemosphere*, 287, 132309, <https://doi.org/10.1016/j.chemosphere.2021.132309>, 2022.
- Jeong, C.-H., Wang, J. M., Hilker, N., Debosz, J., Sofowote, U., Su, Y., Noble, M., Healy, R. M., Munoz, T., Dabek-Zlotorzynska, E., Celo, V., White, L., Audette, C., Herod, D., and Evans, G. J.: Temporal and spatial variability of traffic-related PM<sub>2.5</sub> sources: Comparison of exhaust and non-exhaust emissions, *Atmospheric Environment*, 198, 55-69, <https://doi.org/10.1016/j.atmosenv.2018.10.038>, 2019.
- Kim, H., Zhang, Q., Bae, G. N., Kim, J. Y., and Lee, S. B.: Sources and atmospheric processing of winter aerosols in Seoul, Korea: insights from real-time measurements using a high-resolution aerosol mass spectrometer, *Atmos. Chem. Phys.*, 17, 2009-2033, <https://doi.org/10.5194/acp-17-2009-2017>, 2017.
- Kim, H., Zhang, Q., and Heo, J.: Influence of intense secondary aerosol formation and long-range transport on aerosol chemistry and properties in the Seoul Metropolitan Area during spring time: results from KORUS-AQ, *Atmos. Chem. Phys.*, 18, 7149-7168, <https://doi.org/10.5194/acp-18-7149-2018>, 2018.
- Kim, H., Zhang, Q., and Sun, Y.: Measurement report: Characterization of severe spring haze episodes and influences of long-range transport in the Seoul metropolitan area in March 2019, *Atmos. Chem. Phys.*, 20, 11527-11550, <https://doi.org/10.5194/acp-20-11527-2020>, 2020.

- Kim, Y., Kim, H., Kang, H., de Foy, B., and Zhang, Q.: Impacts of secondary aerosol formation and long range transport on severe haze during the winter of 2017 in the Seoul metropolitan area, *Sci Total Environ*, 804, 149984, <https://doi.org/10.1016/j.scitotenv.2021.149984>, 2022.
- Kommula, S. M., Buchholz, A., Gramlich, Y., Mielonen, T., Hao, L., Pullinen, I., Vettikkat, L., Ylisirniö, A., Joutsensaari, J., Schobesberger, S., Tiitta, P., Leskinen, A., Rees, D. H.-., Haslett, S. L., Siegel, K., Lunder, C., Zieger, P., Krejci, R., Romakkaniemi, S., Mohr, C., and Virtanen, A.: Effect of Long-Range Transported Fire Aerosols on Cloud Condensation Nuclei Concentrations and Cloud Properties at High Latitudes, *Geophysical Research Letters*, 51, e2023GL107134, <https://doi.org/10.1029/2023GL107134>, 2024.
- Kompalli, S. K., Babu, S. S., Ajith, T. C., Moorthy, K. K., Satheesh, S. K., Boopathy, R., Das, T., Liu, D., Allan, J., and Coe, H.: Aging of biomass burning emissions in the Indo-Gangetic Plain outflow: Implications for black carbon light-absorption enhancement, *Atmospheric Research*, 294, 106949, <https://doi.org/10.1016/j.atmosres.2023.106949>, 2023.
- Koss, A. R., Sekimoto, K., Gilman, J. B., Selimovic, V., Coggon, M. M., Zarzana, K. J., Yuan, B., Lerner, B. M., Brown, S. S., Jimenez, J. L., Krechmer, J., Roberts, J. M., Warneke, C., Yokelson, R. J., and de Gouw, J.: Non-methane organic gas emissions from biomass burning: identification, quantification, and emission factors from PTR-ToF during the FIREX 2016 laboratory experiment, *Atmos. Chem. Phys.*, 18, 3299-3319, <https://doi.org/10.5194/acp-18-3299-2018>, 2018.
- Lalchandani, V., Kumar, V., Tobler, A., M. Thamban, N., Mishra, S., Slowik, J. G., Bhattu, D., Rai, P., Satish, R., Ganguly, D., Tiwari, S., Rastogi, N., Tiwari, S., Močnik, G., Prévôt, A. S. H., and Tripathi, S. N.: Real-time characterization and source apportionment of fine particulate matter in the Delhi megacity area during late winter, *Science of The Total Environment*, 770, 145324, <https://doi.org/10.1016/j.scitotenv.2021.145324>, 2021.
- Lalchandani, V., Srivastava, D., Dave, J., Mishra, S., Tripathi, N., Shukla, A. K., Sahu, R., Thamban, N. M., Gaddamidi, S., Dixit, K., Ganguly, D., Tiwari, S., Srivastava, A. K., Sahu, L., Rastogi, N., Gargava, P., and Tripathi, S. N.: Effect of Biomass Burning on PM<sub>2.5</sub> Composition and Secondary Aerosol Formation During Post-Monsoon and Winter Haze Episodes in Delhi, *Journal of Geophysical Research: Atmospheres*, 127, e2021JD035232, <https://doi.org/10.1029/2021JD035232>, 2022.
- Lei, L., Xie, C., Wang, D., He, Y., Wang, Q., Zhou, W., Hu, W., Fu, P., Chen, Y., Pan, X., Wang, Z., Worsnop, D. R., and Sun, Y.: Fine particle characterization in a coastal city in China: composition, sources, and impacts of industrial emissions, *Atmos. Chem. Phys.*, 20, 2877-2890, <https://doi.org/10.5194/acp-20-2877-2020>, 2020.
- Li, H., Zhang, Q., Zheng, B., Chen, C., Wu, N., Guo, H., Zhang, Y., Zheng, Y., Li, X., and He, K.: Nitrate-driven urban haze pollution during summertime over the North China Plain, *Atmos Chem Phys*, 18, 5293-5306, <https://doi.org/10.5194/acp-18-5293-2018>, 2018.
- Li, J., Cao, L., Gao, W., He, L., Yan, Y., He, Y., Pan, Y., Ji, D., Liu, Z., and Wang, Y.: Seasonal variations in the highly time-resolved aerosol composition, sources and chemical processes of background submicron particles in the North China Plain, *Atmos. Chem. Phys.*, 21, 4521-4539, <https://doi.org/10.5194/acp-21-4521-2021>, 2021.
- Li, K., Chen, L., White, S. J., Zheng, X., Lv, B., Lin, C., Bao, Z., Wu, X., Gao, X., Ying, F., Shen, J., Azzi, M., and Cen, K.: Chemical characteristics and sources of PM<sub>1</sub> during the 2016 summer in Hangzhou, *Environ Pollut*, 232, 42-54, <https://doi.org/10.1016/j.envpol.2017.09.016>, 2018.
- Li, S., Liu, D., Kong, S., Wu, Y., Hu, K., Zheng, H., Cheng, Y., Zheng, S., Jiang, X., Ding, S., Hu, D., Liu, Q., Tian, P., Zhao, D., and Sheng, J.: Evolution of source attributed organic aerosols and gases in a megacity of central China, *Atmos. Chem. Phys.*, 22, 6937-6951, <https://doi.org/10.5194/acp-22-6937-2022>, 2022.

- Li, Y., Du, A. D., Li, Z. J., Li, J., Chen, C., Sun, J. X., Qiu, Y. M., Zhang, Z. Q., Wang, Q. Q., Xu, W. Q., Liu, X. A., Ji, D. S., Zhang, W. J., and Sun, Y. L.: Investigation of sources and formation mechanisms of fine particles and organic aerosols in cold season in Fenhe Plain, China, *Atmospheric Research*, 268, 106018, <https://doi.org/ARTN 106018> 10.1016/j.atmosres.2022.106018, 2022.
- Li, Y. e., Zhu, B., Lei, Y., Li, C., Wang, H., Huang, C., Zhou, M., Miao, Q., Wei, H., Wu, Y., Zhang, X., Ding, H., Yang, Q., Zou, Q., Huang, D., Ge, X., and Wang, J.: Characteristics, formation, and sources of PM<sub>2.5</sub> in 2020 in Suzhou, Yangtze River Delta, China, *Environmental Research*, 212, 113545, <https://doi.org/10.1016/j.envres.2022.113545>, 2022.
- Li, Z., Lei, L., Li, Y., Chen, C., Wang, Q., Zhou, W., Sun, J., Xie, C., and Sun, Y.: Aerosol characterization in a city in central China plain and implications for emission control, *J Environ Sci*, 104, 242-252, <https://doi.org/10.1016/j.jes.2020.11.015>, 2021.
- Li, Z. J., Sun, Y. L., Wang, Q. Q., Xin, J. Y., Sun, J. X., Lei, L., Li, J., Fu, P. Q., and Wang, Z. F.: Nitrate and secondary organic aerosol dominated particle light extinction in Beijing due to clean air action, *Atmospheric Environment*, 269, 118833, <https://doi.org/ARTN 118833> 10.1016/j.atmosenv.2021.118833, 2022.
- Lin, C., Ceburnis, D., Huang, R. J., Xu, W., Spohn, T., Martin, D., Buckley, P., Wenger, J., Hellebust, S., Rinaldi, M., Facchini, M. C., O'Dowd, C., and Ovadnevaite, J.: Wintertime aerosol dominated by solid-fuel-burning emissions across Ireland: insight into the spatial and chemical variation in submicron aerosol, *Atmos. Chem. Phys.*, 19, 14091-14106, <https://doi.org/10.5194/acp-19-14091-2019>, 2019.
- Lin, C., Ceburnis, D., O'Dowd, C., and Ovadnevaite, J.: Seasonality of Aerosol Sources Calls for Distinct Air Quality Mitigation Strategies, *Toxics*, 10, 121, 2022.
- Liu, F., Joo, T., Ditto, J. C., Saavedra, M. G., Takeuchi, M., Boris, A. J., Yang, Y., Weber, R. J., Dillner, A. M., Gentner, D. R., and Ng, N. L.: Oxidized and Unsaturated: Key Organic Aerosol Traits Associated with Cellular Reactive Oxygen Species Production in the Southeastern United States, *Environmental Science & Technology*, 57, 14150-14161, <https://doi.org/10.1021/acs.est.3c03641>, 2023.
- Liu, J., Alexander, L., Fast, J. D., Lindenmaier, R., and Shilling, J. E.: Aerosol characteristics at the Southern Great Plains site during the HI-SCALE campaign, *Atmos. Chem. Phys.*, 21, 5101-5116, <https://doi.org/10.5194/acp-21-5101-2021>, 2021.
- Liu, L., Hohaus, T., Franke, P., Lange, A. C., Tillmann, R., Fuchs, H., Tan, Z., Rohrer, F., Karydis, V., He, Q., Vardhan, V., Andres, S., Bohn, B., Holland, F., Winter, B., Wedel, S., Novelli, A., Hofzumahaus, A., Wahner, A., and Kiendler-Scharr, A.: Observational evidence reveals the significance of nocturnal chemistry in seasonal secondary organic aerosol formation, *npj Climate and Atmospheric Science*, 7, 207, <https://doi.org/10.1038/s41612-024-00747-6>, 2024.
- Liu, P., Zhou, H., Chun, X., Wan, Z., Liu, T., and Sun, B.: Characteristics and sources of carbonaceous aerosols in a semi-arid city: Quantifying anthropogenic and meteorological impacts, *Chemosphere*, 335, 139056, <https://doi.org/10.1016/j.chemosphere.2023.139056>, 2023.
- Liu, T., Zhou, L., Liu, Q., Lee, B. P., Yao, D., Lu, H., Lyu, X., Guo, H., and Chan, C. K.: Secondary Organic Aerosol Formation from Urban Roadside Air in Hong Kong, *Environ. Sci. Technol.*, 53, 3001-3009, <https://doi.org/10.1021/acs.est.8b06587>, 2019.
- Lu, M. H., Zheng, J. Y., Huang, Z. J., Wu, C., Zheng, C. Z., Jia, G. L., Zhang, L. H., Jiang, F., Li, Z., Liu, J. W., and Chen, D. H.: Insight into the characteristics of carbonaceous aerosols at urban and regional sites in the downwind area of Pearl River Delta region, China, *Science of the Total Environment*, 778, 146251, <https://doi.org/ARTN 146251>

10.1016/j.scitotenv.2021.146251, 2021.

Luo, G., Yu, F., and Moch, J. M.: Further improvement of wet process treatments in GEOS-Chem v12.6.0: impact on global distributions of aerosols and aerosol precursors, *Geosci. Model Dev.*, 13, 2879-2903, <https://doi.org/10.5194/gmd-13-2879-2020>, 2020.

Makkonen, U., Vestenius, M., Huy, L. N., Anh, N. T. N., Linh, P. T. V., Thuy, P. T., Phuong, H. T. M., Nguyen, H., Thuy, L. T., Aurela, M., Hellén, H., Loven, K., Kouznetsov, R., Kyllönen, K., Teinilä, K., and Kim Oanh, N. T.: Chemical composition and potential sources of PM<sub>2.5</sub> in Hanoi, *Atmospheric Environment*, 299, 119650, <https://doi.org/10.1016/j.atmosenv.2023.119650>, 2023.

Manousakas, M. I., Florou, K., and Pandis, S. N.: Source Apportionment of Fine Organic and Inorganic Atmospheric Aerosol in an Urban Background Area in Greece, *Atmosphere*, 11, 330, 2020.

May, A. A., Levin, E. J. T., Hennigan, C. J., Riipinen, I., Lee, T., Collett, J. L., Jimenez, J. L., Kreidenweis, S. M., and Robinson, A. L.: Gas-particle partitioning of primary organic aerosol emissions: 3. Biomass burning, *J. Geophys. Res. Atmos.*, 118, 11327-11338, <https://doi.org/10.1002/jgrd.50828>, 2013.

Mukherjee, S., Singla, V., Pandithurai, G., Safai, P. D., Meena, G. S., Dani, K. K., and Anil Kumar, V.: Seasonal variability in chemical composition and source apportionment of sub-micron aerosol over a high altitude site in Western Ghats, India, *Atmospheric Environment*, 180, 79-92, <https://doi.org/10.1016/j.atmosenv.2018.02.048>, 2018.

Mukherjee, S., Singh, G. K., Dutta, M., Srivastava, V., Qadri, A. M., Gupta, T., and Chatterjee, A.: PM<sub>2.5</sub> pollution exceeding Indian standard over a semi-urban region at eastern IGP: Chemistry, meteorological impact, and long-range transport, *Science of The Total Environment*, 898, 165415, <https://doi.org/10.1016/j.scitotenv.2023.165415>, 2023.

Mukherjee, S., Patil, R. D., Aslam, M. Y., Meena, G. S., Anil Kumar, V., Patil, S. S., Mahajan, A. S., Tinel, L., Waghmare, V. V., and Pandithurai, G.: Aerosol volatility over a high-altitude site in India: Effect of semi-volatile organics, *Atmospheric Research*, 315, 107877, <https://doi.org/10.1016/j.atmosres.2024.107877>, 2025.

Niu, X., Wang, Y., Ho, S. S. H., Chuang, H.-C., Sun, J., Qu, L., Wang, G., and Ho, K. F.: Characterization of organic aerosols in PM<sub>1</sub> and their cytotoxicity in an urban roadside area in Hong Kong, *Chemosphere*, 263, 128239, <https://doi.org/10.1016/j.chemosphere.2020.128239>, 2021.

Nursanto, F. R., Meinen, R., Holzinger, R., Krol, M. C., Liu, X., Dusek, U., Henzing, B., and Fry, J. L.: What chemical species are responsible for new particle formation and growth in the Netherlands? A hybrid positive matrix factorization (PMF) analysis using aerosol composition (ACSM) and size (SMPS), *Atmos. Chem. Phys.*, 23, 10015-10034, <https://doi.org/10.5194/acp-23-10015-2023>, 2023.

Ou, H. J., Cai, M. F., Liang, B. L., Sun, Q. B., Zhou, S. Z., Xu, Y. S., Ren, L. H., and Zhao, J.: Characterization, Sources, and Chemical Processes of Submicron Aerosols at a Mountain Site in Central China, *Journal of Geophysical Research: Atmospheres*, 128, e2022JD038258, <https://doi.org/10.1029/2022jd038258>, 2023.

Park, J.-M., Lee, T.-J., and Kim, D.-S.: Physicochemical Characteristics of PM<sub>2.5</sub> Based on Long-term Hourly Data at National Intensive Monitoring Sites in Korea, *Asian Journal of Atmospheric Environment*, 16, 2022033, <https://doi.org/10.5572/ajae.2022.033>, 2022.

Patel, K., Wang, D., Chhabra, P., Bean, J., Dhulipala, S. V., and Hildebrandt Ruiz, L.: Effects of Sources and Meteorology on Ambient Particulate Matter in Austin, Texas, *ACS Earth and Space Chemistry*, 4, 602-613, <https://doi.org/10.1021/acsearthspacechem.0c00016>, 2020.

- Pauraite, J., Plauškaitė, K., Dudoitis, V., and Ulevicius, V.: Relationship between the Optical Properties and Chemical Composition of Urban Aerosol Particles in Lithuania, *Advances in Meteorology*, 2018, 8674173, <https://doi.org/10.1155/2018/8674173>, 2018.
- Pauraite, J., Dudoitis, V., and Byčenkienė, S.: Assessment of Carbonaceous Aerosol Properties across an Urban Environment during the Cold Season, *Atmosphere*, 14, 1054, 2023.
- Phairuang, W., Inerb, M., Furuuchi, M., Hata, M., Tekasakul, S., and Tekasakul, P.: Size-fractionated carbonaceous aerosols down to PM<sub>0.1</sub> in southern Thailand: Local and long-range transport effects, *Environmental Pollution*, 260, 114031, <https://doi.org/10.1016/j.envpol.2020.114031>, 2020.
- Presto, A. A., Miracolo, M. A., Donahue, N. M., and Robinson, A. L.: Secondary Organic Aerosol Formation from High-NO<sub>x</sub> Photo-Oxidation of Low Volatility Precursors: *n*-Alkanes, *Environ. Sci. Technol.*, 44, 2029-2034, <https://doi.org/10.1021/es903712r>, 2010.
- Pullokaran, D., Bhardwaj, A., Haswani, D., Yadav, K., Sunder Raman, R., Shukla, D., Dhandapani, A., Iqbal, J., Kumar, R. N., Prasad, L., Venkatesh, P., and Murthy, B. M. S.: Spatio-Temporal Trends of the Relationships Between Surface PM<sub>2.5</sub> and Its Chemical Constituents Across Three COALESCE Network Locations in India: A Mass Closure Investigation, *Journal of Geophysical Research: Atmospheres*, 129, e2023JD039855, <https://doi.org/10.1029/2023JD039855>, 2024.
- Qadri, A. M., Singh, G. K., Srivastava, V., Gupta, T., Rabha, S., Islam, N., and Saikia, B. K.: Identifying the sources of PM<sub>2.5</sub> at a COALESCE site in the Brahmaputra Valley Region using dispersion normalized PMF, *Atmospheric Environment*, 327, 120501, <https://doi.org/10.1016/j.atmosenv.2024.120501>, 2024.
- Qian, Y. J., Cai, D. M., Zhang, M. M., Huang, X. J., Huo, J. T., Duan, Y. S., and Cheng, T. T.: Chemical composition, sources and evolution of wintertime inorganic and organic aerosols in urban Shanghai, China, *Front Env Sci-Switz*, 11, <https://doi.org/ARTN 1199652> 10.3389/fenvs.2023.1199652, 2023.
- Rai, A., Mukherjee, S., Choudhary, N., Ghosh, A., Chatterjee, A., Mandal, T. K., Sharma, S. K., and Kotnala, R. K.: Seasonal Transport Pathway and Sources of Carbonaceous Aerosols at an Urban Site of Eastern Himalaya, *Aerosol Science and Engineering*, 5, 318-343, <https://doi.org/10.1007/s41810-021-00106-5>, 2021.
- Rejano, F., Casans, A., Via, M., Casquero-Vera, J. A., Castillo, S., Lyamani, H., Cazorla, A., Andrews, E., Pérez-Ramírez, D., Alastuey, A., Gómez-Moreno, F. J., Alados-Arboledas, L., Olmo, F. J., and Titos, G.: CCN estimations at a high-altitude remote site: role of organic aerosol variability and hygroscopicity, *EGUsphere*, 2024, 1-39, <https://doi.org/10.5194/egusphere-2024-1059>, 2024.
- Reyes-Villegas, E., Panda, U., Darbyshire, E., Cash, J. M., Joshi, R., Langford, B., Di Marco, C. F., Mullinger, N. J., Alam, M. S., Crilley, L. R., Rooney, D. J., Acton, W. J. F., Drysdale, W., Nemitz, E., Flynn, M., Voliotis, A., McFiggans, G., Coe, H., Lee, J., Hewitt, C. N., Heal, M. R., Gunthe, S. S., Mandal, T. K., Gurjar, B. R., Shivani, Gadi, R., Singh, S., Soni, V., and Allan, J. D.: PM<sub>1</sub> composition and source apportionment at two sites in Delhi, India, across multiple seasons, *Atmos. Chem. Phys.*, 21, 11655-11667, <https://doi.org/10.5194/acp-21-11655-2021>, 2021.
- Santijitpakdee, T., Prapamontol, T., Ponsawansong, P., Kawichai, S., Song, W., Cao, F., and Zhang, Y.: PM<sub>2.5</sub>-Bound Fatty Acids and Oxidative Potential: A Year-Round Study in Chiang Mai, Upper Northern Thailand, *Natural and Life Sciences Communications*, 23, e2024064, <https://doi.org/10.12982/NLSC.2024.064>, 2024.

- Sharma, S. K., Mandal, T. K., Banoo, R., Rai, A., and Rani, M.: Long-Term Variation in Carbonaceous Components of PM<sub>2.5</sub> from 2012 to 2021 in Delhi, *Bulletin of Environmental Contamination and Toxicology*, 109, 502-510, <https://doi.org/10.1007/s00128-022-03506-6>, 2022.
- Shivani, Gadi, R., Sharma, S. K., and Mandal, T. K.: Seasonal variation, source apportionment and source attributed health risk of fine carbonaceous aerosols over National Capital Region, India, *Chemosphere*, 237, 124500, <https://doi.org/10.1016/j.chemosphere.2019.124500>, 2019.
- Shukla, A. K., Lalchandani, V., Bhattu, D., Dave, J. S., Rai, P., Thamban, N. M., Mishra, S., Gaddamidi, S., Tripathi, N., Vats, P., Rastogi, N., Sahu, L., Ganguly, D., Kumar, M., Singh, V., Gargava, P., and Tripathi, S. N.: Real-time quantification and source apportionment of fine particulate matter including organics and elements in Delhi during summertime, *Atmospheric Environment*, 261, 118598, <https://doi.org/10.1016/j.atmosenv.2021.118598>, 2021.
- Singh, A., Satish, R. V., and Rastogi, N.: Characteristics and sources of fine organic aerosol over a big semi-arid urban city of western India using HR-ToF-AMS, *Atmospheric Environment*, 208, 103-112, <https://doi.org/10.1016/j.atmosenv.2019.04.009>, 2019.
- Song, I. H., Park, J. S., Park, S. M., Kim, D. G., Kim, Y. W., and Shin, H. J.: Seasonal characteristics of PM<sub>1</sub> in Seoul, Korea, measured using HR-ToF-Aerosol Mass Spectrometer in 2018, *Atmospheric Environment*, 266, 118717, <https://doi.org/10.1016/j.atmosenv.2021.118717>, 2021.
- Song, J., Saathoff, H., Gao, L., Gebhardt, R., Jiang, F., Vallon, M., Bauer, J., Norra, S., and Leisner, T.: Variations of PM<sub>2.5</sub> sources in the context of meteorology and seasonality at an urban street canyon in Southwest Germany, *Atmospheric Environment*, 282, 119147, <https://doi.org/10.1016/j.atmosenv.2022.119147>, 2022.
- Stewart, G. J., Nelson, B. S., Acton, W. J. F., Vaughan, A. R., Hopkins, J. R., Yunus, S. S. M., Hewitt, C. N., Nemitz, E., Mandal, T. K., Gadi, R., Sahu, L. K., Rickard, A. R., Lee, J. D., and Hamilton, J. F.: Comprehensive organic emission profiles, secondary organic aerosol production potential, and OH reactivity of domestic fuel combustion in Delhi, India, *Environ. Sci.: Atmos.*, 1, 104-117, <https://doi.org/10.1039/d0ea00009d>, 2021.
- Sun, P., Farley, R. N., Li, L., Srivastava, D., Niedek, C. R., Li, J., Wang, N., Cappa, C. D., Pusede, S. E., Yu, Z., Croteau, P., and Zhang, Q.: PM<sub>2.5</sub> composition and sources in the San Joaquin Valley of California: A long-term study using ToF-ACSM with the capture vaporizer, *Environmental Pollution*, 292, 118254, <https://doi.org/10.1016/j.envpol.2021.118254>, 2022.
- Tang, C., Zhang, X., Tian, P., Guan, X., Lin, Y., Pang, S., Guo, Q., Du, T., Zhang, Z., Zhang, M., Xu, J., and Zhang, L.: Chemical characteristics and regional transport of submicron particulate matter at a suburban site near Lanzhou, China, *Environmental Research*, 212, 113179, <https://doi.org/10.1016/j.envres.2022.113179>, 2022.
- Tang, M.-X., Huang, X.-F., Sun, T.-L., Cheng, Y., Luo, Y., Chen, Z., Lin, X.-Y., Cao, L.-M., Zhai, Y.-H., and He, L.-Y.: Decisive role of ozone formation control in winter PM<sub>2.5</sub> mitigation in Shenzhen, China, *Environmental Pollution*, 301, 119027, <https://doi.org/10.1016/j.envpol.2022.119027>, 2022.
- Tao, J., Huang, J., Bian, G., Zhang, L., Zhou, Z., Zhang, Z., Li, J., Miao, Y., Yuan, Z., Sha, Q., Xiao, L., and Wang, B.: Fine particulate pollution driven by nitrate in the moisture urban atmospheric environment in the Pearl River Delta region of south China, *J Environ Manage*, 326, 116704, <https://doi.org/10.1016/j.jenvman.2022.116704>, 2023.
- Tefera, W., Kumie, A., Berhane, K., Gilliland, F., Lai, A., Sricharoenvech, P., Samet, J., Patz, J., and Schauer, J. J.: Chemical Characterization and Seasonality of Ambient Particles (PM<sub>2.5</sub>) in the City Centre of Addis Ababa, *International Journal of Environmental Research and Public Health*, 17, 6998, 2020.

Tobler, A., Bhattu, D., Canonaco, F., Lalchandani, V., Shukla, A., Thamban, N. M., Mishra, S., Srivastava, A. K., Bisht, D. S., Tiwari, S., Singh, S., Močnik, G., Baltensperger, U., Tripathi, S. N., Slowik, J. G., and Prévôt, A. S. H.: Chemical characterization of PM<sub>2.5</sub> and source apportionment of organic aerosol in New Delhi, India, *Science of The Total Environment*, 745, 140924, <https://doi.org/10.1016/j.scitotenv.2020.140924>, 2020.

Tran, N., Fujii, Y., Le, V. X., Nguyen, D. T. C., Okochi, H., Thi Hien, T., and Takenaka, N.: Annual Variation of PM<sub>2.5</sub> Chemical Composition in Ho Chi Minh City, Vietnam Including the COVID-19 Outbreak Period, *Aerosol and Air Quality Research*, 23, 220312, <https://doi.org/10.4209/aaqr.220312>, 2023.

Valle-Hernández, B. L., Figueroa-Lara, J. d. J., Torres-Rodríguez, M., Ginéz-Hernández, N., Álvarez-Lupercio, T., and Mugica-Álvarez, V.: Levels, Sources and Risk Assessment of Carbonaceous and Organic Species Associated with PM<sub>2.5</sub> in Two Small Cities of Morelos, Mexico, *Atmosphere*, 15, 1496, 2024.

Vispute, A. S., Acharja, P., Gosavi, S. W., Govardhan, G., Ruge, V., Patil, M. N., Dharmaraj, T., and Ghude, S. D.: Source characteristics of Non-Refractory Particulate Matter (NR-PM<sub>1</sub>) using High-Resolution Time-of-Flight Aerosol Mass Spectrometric (HR-ToF-AMS) measurements in the urban industrial city in India, *Atmospheric Environment*, 121186, <https://doi.org/10.1016/j.atmosenv.2025.121186>, 2025.

Wallace, H. W., Sanchez, N. P., Flynn, J. H., Erickson, M. H., Lefer, B. L., and Griffin, R. J.: Source apportionment of particulate matter and trace gases near a major refinery near the Houston Ship Channel, *Atmos. Environ.*, 173, 16-29, <https://doi.org/10.1016/j.atmosenv.2017.10.049>, 2018.

Wang, J., Ge, X., Chen, Y., Shen, Y., Zhang, Q., Sun, Y., Xu, J., Ge, S., Yu, H., and Chen, M.: Highly time-resolved urban aerosol characteristics during springtime in Yangtze River Delta, China: insights from soot particle aerosol mass spectrometry, *Atmos Chem Phys*, 16, 9109-9127, <https://doi.org/10.5194/acp-16-9109-2016>, 2016.

Wang, M., Tian, P., Wang, L., Yu, Z., Du, T., Chen, Q., Guan, X., Guo, Y., Zhang, M., Tang, C., Chang, Y., Shi, J., Liang, J., Cao, X., and Zhang, L.: High contribution of vehicle emissions to fine particulate pollutions in Lanzhou, Northwest China based on high-resolution online data source appointment, *Science of The Total Environment*, 798, 149310, <https://doi.org/10.1016/j.scitotenv.2021.149310>, 2021.

Wang, M., Duan, Y., Xu, W., Wang, Q., Zhang, Z., Yuan, Q., Li, X., Han, S., Tong, H., Huo, J., Chen, J., Gao, S., Wu, Z., Cui, L., Huang, Y., Xiu, G., Cao, J., Fu, Q., and Lee, S.: Measurement report: Characterisation and sources of the secondary organic carbon in a Chinese megacity over 5 years from 2016 to 2020, *Atmos. Chem. Phys.*, 22, 12789-12802, <https://doi.org/10.5194/acp-22-12789-2022>, 2022.

Wang, Q., Li, J., Yang, J., Chen, Y., Li, Y., Li, S., Xie, C., Chen, C., Wang, L., Wang, L., Wang, W., Tong, S., and Sun, Y.: Seasonal characterization of aerosol composition and sources in a polluted city in Central China, *Chemosphere*, 258, 127310, <https://doi.org/10.1016/j.chemosphere.2020.127310>, 2020.

Wang, Y., Wang, Q., Ye, J., Li, L., Zhou, J., Ran, W., Zhang, R., Wu, Y., and Cao, J.: Chemical composition and sources of submicron aerosols in winter at a regional site in Beijing-Tianjin-Hebei region: Implications for the Joint Action Plan, *Sci Total Environ*, 719, 137547, <https://doi.org/10.1016/j.scitotenv.2020.137547>, 2020.

Wang, Y., Li, X., Wang, Q., Zhou, B., Liu, S., Tian, J., Hao, Q., Li, G., Han, Y., Hang Ho, S. S., and Cao, J.: Response of aerosol composition to the clean air actions in Baoji city of Fen-Wei River Basin, *Environmental Research*, 210, 112936, <https://doi.org/10.1016/j.envres.2022.112936>, 2022.

- Wang, Y., Wang, Q., Tian, J., Zhang, Y., Wu, Y., Ran, W., Zhang, R., and Cao, J.: Aerosol composition, sources, and secondary processing during autumn at a regional site in the Beijing–Tianjin–Hebei region, *Particuology*, 75, 177-184, <https://doi.org/10.1016/j.partic.2022.07.011>, 2023.
- Wu, S.-P., Cai, M.-J., Xu, C., Zhang, N., Zhou, J.-B., Yan, J.-P., Schwab, J. J., and Yuan, C.-S.: Chemical nature of PM<sub>2.5</sub> and PM<sub>10</sub> in the coastal urban Xiamen, China: Insights into the impacts of shipping emissions and health risk, *Atmospheric Environment*, 227, 117383, <https://doi.org/10.1016/j.atmosenv.2020.117383>, 2020.
- Wu, Y., Liu, D., Tian, P., Sheng, J., Liu, Q., Li, R., Hu, K., Jiang, X., Li, S., Bi, K., Zhao, D., Huang, M., Ding, D., and Wang, J.: Tracing the Formation of Secondary Aerosols Influenced by Solar Radiation and Relative Humidity in Suburban Environment, *Journal of Geophysical Research: Atmospheres*, 127, e2022JD036913, <https://doi.org/10.1029/2022JD036913>, 2022.
- Xian, J. K., Cui, S. J., Chen, X. Z., Wang, J. Y., Xiong, Y. F., Gu, C. J., Wang, Y., Zhang, Y. J., Li, H. W., Wang, J. F., and Ge, X. L.: Online chemical characterization of atmospheric fine secondary aerosols and organic nitrates in summer Nanjing, China, *Atmospheric Research*, 290, 106783, <https://doi.org/ARTN 106783> 10.1016/j.atmosres.2023.106783, 2023.
- Xie, M., Lu, X., Ding, F., Cui, W., Zhang, Y., and Feng, W.: Evaluating the influence of constant source profile presumption on PMF analysis of PM<sub>2.5</sub> by comparing long- and short-term hourly observation-based modeling, *Environmental Pollution*, 314, 120273, <https://doi.org/10.1016/j.envpol.2022.120273>, 2022.
- Xu, J., Zhang, Q., Shi, J., Ge, X., Xie, C., Wang, J., Kang, S., Zhang, R., and Wang, Y.: Chemical characteristics of submicron particles at the central Tibetan Plateau: insights from aerosol mass spectrometry, *Atmos. Chem. Phys.*, 18, 427-443, <https://doi.org/10.5194/acp-18-427-2018>, 2018.
- Xu, J., Ge, X., Zhang, X., Zhao, W., Zhang, R., and Zhang, Y.: COVID-19 Impact on the Concentration and Composition of Submicron Particulate Matter in a Typical City of Northwest China, *Geophys Res Lett*, 47, e2020GL089035, <https://doi.org/10.1029/2020GL089035>, 2020.
- Xu, J., Zhang, X., Zhao, W., Zhai, L., Zhong, M., Shi, J., Sun, J., Liu, Y., Xie, C., Tan, Y., Li, K., Ge, X., Zhang, Q., and Kang, S.: High-resolution physicochemical dataset of atmospheric aerosols over the Tibetan Plateau and its surroundings, *Earth Syst. Sci. Data*, 16, 1875-1900, <https://doi.org/10.5194/essd-16-1875-2024>, 2024.
- Xu, W., Chen, C., Qiu, Y., Li, Y., Zhang, Z., Karnezi, E., Pandis, S. N., Xie, C., Li, Z., Sun, J., Ma, N., Xu, W., Fu, P., Wang, Z., Zhu, J., Worsnop, D. R., Ng, N. L., and Sun, Y.: Organic aerosol volatility and viscosity in the North China Plain: contrast between summer and winter, *Atmos. Chem. Phys.*, 21, 5463-5476, <https://doi.org/10.5194/acp-21-5463-2021>, 2021.
- Xu, X., Feng, X., Chen, J., Yin, H., Zhang, Y., and Liu, Z.: Pollution characteristics of carbonaceous components in PM<sub>2.5</sub> in the Chengdu City, *ENVIRONMENTAL CHEMISTRY*, 40, 2481-2492, 2021.
- Yadav, K., Sunder Raman, R., Bhardwaj, A., Paul, D., Gupta, T., Shukla, D., Laxmi Prasad, S. V., Lokesh, K. S., and Venkatesh, P.: Tracing the predominant sources of carbon in PM<sub>2.5</sub> using  $\delta^{13}\text{C}$  values together with OC/EC and select inorganic ions over two COALESCE locations, *Chemosphere*, 308, 136420, <https://doi.org/10.1016/j.chemosphere.2022.136420>, 2022.
- Yu, K., Zhu, Q., Du, K., and Huang, X. F.: Characterization of nighttime formation of particulate organic nitrates based on high-resolution aerosol mass spectrometry in an urban atmosphere in China, *Atmos. Chem. Phys.*, 19, 5235-5249, <https://doi.org/10.5194/acp-19-5235-2019>, 2019.

- Zhai, M., Kuang, Y., Liu, L., He, Y., Luo, B., Xu, W., Tao, J., Zou, Y., Li, F., Yin, C., Li, C., Xu, H., and Deng, X.: Insights into characteristics and formation mechanisms of secondary organic aerosols in the Guangzhou urban area, *Atmos. Chem. Phys.*, 23, 5119-5133, <https://doi.org/10.5194/acp-23-5119-2023>, 2023.
- Zhang, J., Wang, J., Sun, Y., Zhou, S., Shrivastava, M., Catena, A., Ng, N. L., Zhang, Q., and Schwab, J.: The Response of Summertime Organic Aerosol Composition to Emission Controls in the Northeastern United States, *Journal of Geophysical Research: Atmospheres*, 127, e2022JD037056, <https://doi.org/10.1029/2022JD037056>, 2022.
- Zhang, X., Cappa, C. D., Jathar, S. H., McVay, R. C., Ensberg, J. J., Kleeman, M. J., and Seinfeld, J. H.: Influence of vapor wall loss in laboratory chambers on yields of secondary organic aerosol, *Proc. Natl. Acad. Sci. U. S. A.*, 111, 5802-5807, <https://doi.org/10.1073/pnas.1404727111>, 2014.
- Zhang, X., Xu, J., Kang, S., Liu, Y., and Zhang, Q.: Chemical characterization of long-range transport biomass burning emissions to the Himalayas: insights from high-resolution aerosol mass spectrometry, *Atmos. Chem. Phys.*, 18, 4617-4638, <https://doi.org/10.5194/acp-18-4617-2018>, 2018.
- Zhang, X., Xu, J., Kang, S., Zhang, Q., and Sun, J.: Chemical characterization and sources of submicron aerosols in the northeastern Qinghai–Tibet Plateau: insights from high-resolution mass spectrometry, *Atmos. Chem. Phys.*, 19, 7897-7911, <https://doi.org/10.5194/acp-19-7897-2019>, 2019.
- Zhang, X., Bao, Z., Zhang, L., Zhou, J., Che, H., Li, Q., Tian, M., Yang, F., and Chen, Y.: Biomass burning and aqueous reactions drive the elevation of wintertime PM<sub>2.5</sub> in the rural area of the Sichuan basin, China, *Atmospheric Environment*, 306, 119779, <https://doi.org/10.1016/j.atmosenv.2023.119779>, 2023.
- Zhang, Y., Tang, L., Croteau, P. L., Favez, O., Sun, Y., Canagaratna, M. R., Wang, Z., Couvidat, F., Albinet, A., Zhang, H., Sciare, J., Prevot, A. S. H., Jayne, J. T., and Worsnop, D. R.: Field characterization of the PM<sub>2.5</sub> Aerosol Chemical Speciation Monitor: insights into the composition, sources, and processes of fine particles in eastern China, *Atmos Chem Phys*, 17, 14501-14517, <https://doi.org/10.5194/acp-17-14501-2017>, 2017.
- Zhang, Y., Du, W., Wang, Y., Wang, Q., Wang, H., Zheng, H., Zhang, F., Shi, H., Bian, Y., Han, Y., Fu, P., Canonaco, F., Prévôt, A. S. H., Zhu, T., Wang, P., Li, Z., and Sun, Y.: Aerosol chemistry and particle growth events at an urban downwind site in North China Plain, *Atmos. Chem. Phys.*, 18, 14637-14651, <https://doi.org/10.5194/acp-18-14637-2018>, 2018.
- Zhao, Q. B., Huo, J. T., Yang, X., Fu, Q. Y., Duan, Y. S., Liu, Y. X., Lin, Y. F., and Zhang, Q.: Chemical characterization and source identification of submicron aerosols from a year-long real-time observation at a rural site of Shanghai using an Aerosol Chemical Speciation Monitor, *Atmospheric Research*, 246, 105154, <https://doi.org/ARTN 105154 10.1016/j.atmosres.2020.105154>, 2020.
- Zhao, Y., Hennigan, C. J., May, A. A., Tkacik, D. S., de Gouw, J. A., Gilman, J. B., Kuster, W. C., Borbon, A., and Robinson, A. L.: Intermediate-volatility organic compounds: a large source of secondary organic aerosol, *Environ Sci Technol*, 48, 13743-13750, <https://doi.org/10.1021/es5035188>, 2014.
- Zheng, Y., Miao, R., Zhang, Q., Li, Y., Cheng, X., Liao, K., Koenig, T. K., Ge, Y., Tang, L., Shang, D., Hu, M., Chen, S., and Chen, Q.: Secondary Formation of Submicron and Supermicron Organic and Inorganic Aerosols in a Highly Polluted Urban Area, *Journal of Geophysical Research: Atmospheres*, 128, e2022JD037865, <https://doi.org/10.1029/2022JD037865>, 2023.
- Zhong, H., Huang, R.-J., Chang, Y., Duan, J., Lin, C., and Chen, Y.: Enhanced formation of secondary organic aerosol from photochemical oxidation during the COVID-19 lockdown in a background site in Northwest China, *Science of The Total Environment*, 778, 144947, <https://doi.org/10.1016/j.scitotenv.2021.144947>, 2021.

Zhong, H., Huang, R. J., Lin, C., Xu, W., Duan, J., Gu, Y., Huang, W., Ni, H., Zhu, C., You, Y., Wu, Y., Zhang, R., Ovadnevaite, J., Ceburnis, D., and O'Dowd, C. D.: Measurement report: On the contribution of long-distance transport to the secondary aerosol formation and aging, *Atmos. Chem. Phys.*, 22, 9513-9524, <https://doi.org/10.5194/acp-22-9513-2022>, 2022.

Zhou, S., Guo, F., Chao, C.-Y., Yoon, S., Alvarez, S. L., Shrestha, S., Flynn, J. H., III, Usenko, S., Sheesley, R. J., and Griffin, R. J.: Marine Submicron Aerosols from the Gulf of Mexico: Polluted and Acidic with Rapid Production of Sulfate and Organosulfates, *Environmental Science & Technology*, 57, 5149-5159, <https://doi.org/10.1021/acs.est.2c05469>, 2023.

Zhu, Q., He, L.-Y., Huang, X.-F., Cao, L.-M., Gong, Z.-H., Wang, C., Zhuang, X., and Hu, M.: Atmospheric aerosol compositions and sources at two national background sites in northern and southern China, *Atmos Chem Phys*, 16, 10283-10297, <https://doi.org/10.5194/acp-16-10283-2016>, 2016.

Zhu, W., Zhou, M., Cheng, Z., Yan, N., Huang, C., Qiao, L., Wang, H., Liu, Y., Lou, S., and Guo, S.: Seasonal variation of aerosol compositions in Shanghai, China: Insights from particle aerosol mass spectrometer observations, *Sci Total Environ*, 771, 144948, <https://doi.org/10.1016/j.scitotenv.2021.144948>, 2021.

Zhu, W., Shi, J., Wang, H., Yu, Y., Tan, R., Shen, R., Chen, J., Lou, S., Hu, M., and Guo, S.: Understanding secondary particles in a regional site of Yangtze River Delta: Insights from mass spectrometric measurement, *Science of The Total Environment*, 933, 172994, <https://doi.org/10.1016/j.scitotenv.2024.172994>, 2024.

Zografou, O., Gini, M., Fetfatzis, P., Granakis, K., Foskinis, R., Manousakas, M. I., Tsopeles, F., Diapouli, E., Dovrou, E., Vasilakopoulou, C. N., Papayannis, A., Pandis, S. N., Nenes, A., and Eleftheriadis, K.: High Altitude Aerosol Chemical Characterization and Source Identification: Insights from the CALISHTO Campaign, *EGUsphere*, 2024, 1-25, <https://doi.org/10.5194/egusphere-2024-737>, 2024.
